1 Full title: **Zika virus-like particles bearing covalent dimer of envelope protein**  
2 **protect mice from lethal challenge**

3 Short title: **Zika virus vaccine exposing E protein dimers**

4

5 Giuditta De Lorenzo<sup>1†</sup>, Rapeepat Tandavanitj<sup>1†</sup>, Jennifer Doig<sup>1</sup>, Chayanee  
6 Setthapramote<sup>1,3</sup>, Monica Poggianella<sup>2</sup>, Ricardo Sanchez Velazquez<sup>1</sup>, Hannah E.  
7 Scales<sup>4</sup>, Julia M. Edgar<sup>4</sup>, Alain Kohl<sup>1</sup>, James Brewer<sup>4</sup>, Oscar R. Burrone<sup>2</sup>, Arvind H.  
8 Patel<sup>1\*</sup>.

9

10 <sup>1</sup> *MRC - University of Glasgow Centre for Virus Research, G61 1QH, Glasgow,*  
11 *Scotland, UK*

12 <sup>2</sup> *Molecular immunology Group, International Centre for Genetic Engineering and*  
13 *Biotechnology, 34149, Trieste, Italy*

14 <sup>3</sup> *Department of Clinical Pathology, Faculty of Medicine Vajira Hospital ,*  
15 *Navamindradhiraj University, Bangkok, 10300, Thailand*

16 <sup>4</sup> *University of Glasgow, Institute of Infection, Immunity and Inflammation, University*  
17 *Place, G12 8TA, Glasgow, Scotland, UK.*

18

19 †Authors equally contributed to this paper

20

## 21 **Abstract**

22 Zika virus (ZIKV) envelope (E) protein is the major target of neutralizing antibodies in  
23 infected host, and thus represents a candidate of interest for vaccine design. However,  
24 a major concern in the development of vaccines against ZIKV and the related dengue  
25 virus is the induction of cross-reactive poorly neutralizing antibodies that can cause

26 antibody-dependent enhancement (ADE) of infection. This risk necessitates particular  
27 care in vaccine design. Specifically, the engineered immunogens should have their  
28 cross-reactive epitopes masked, and they should be optimized for eliciting virus-  
29 specific strongly neutralizing antibodies upon vaccination. Here, we developed ZIKV  
30 subunit- and virus-like particle (VLP)-based vaccines displaying E in its wild type form,  
31 or E locked in a covalently linked dimeric (cvD) conformation to enhance the exposure  
32 of E dimers to the immune system. Compared with their wild-type derivatives, cvD  
33 immunogens elicited antibody with higher capacity of neutralizing virus infection of  
34 cultured cells. More importantly, these immunogens protected animals from lethal  
35 challenge with both the African and Asian lineages of ZIKV, impairing virus  
36 dissemination to brain and sexual organs. Moreover, the locked conformation of E  
37 reduced the exposure of epitopes recognized by cross-reactive antibodies and  
38 therefore showed a lower potential to induce ADE *in vitro*. Our data demonstrated a  
39 higher efficacy of the VLPs in comparison with the soluble dimer and support VLP-cvD  
40 as a promising ZIKV vaccine.

41

## 42 **Author Summary**

43 Infection with Zika virus (ZIKV) leads to the production by host of antibodies that target  
44 the viral surface envelope (E) protein. A subset of these antibodies can inhibit virus  
45 infection, thus making E as a suitable candidate for the development of vaccine  
46 against the virus. However, the anti-ZIKV E antibodies can cross-react with the E  
47 protein of the related dengue virus on account of the high level of similarity exhibited  
48 by the two viral proteins. Such a scenario may lead to severe dengue disease.  
49 Therefore, the design of a ZIKV vaccine requires particular care. Here, we tested two

50 candidate vaccines containing a recombinant form of the ZIKV E protein that is forced  
51 in a covalently stable dimeric conformation (cvD). They were generated with an explicit  
52 aim to reduce the exposure of the cross-reactive epitopes. One vaccine is composed  
53 of a soluble form of the E protein (sE-cvD), the other is a more complex virus-like  
54 particle (VLP-cvD). We used the two candidate vaccines to immunize mice and later  
55 infected with ZIKV. The animals produced high level of inhibitory antibodies and were  
56 protected from the infection. The VLP-cvD was the most effective and we believe it  
57 represents a promising ZIKV vaccine candidate.

58

## 59 **Introduction**

60 For decades Zika virus (ZIKV) was largely ignored as a human pathogen but the recent  
61 epidemic in South America has brought to light neurological complications (i.e.  
62 Guillain-Barré syndrome)(1) and congenital Zika syndrome (i.e. microcephaly and  
63 other malformations)(2) making ZIKV a public health threat in affected countries. ZIKV  
64 infection occurs mainly via mosquito bite but its persistence in bodily fluids like semen  
65 allows sexual transmission (3). There is currently no vaccine or treatment available,  
66 making their development a priority in ZIKV research.

67

68 Current approaches to vaccine development include purified inactivated virus (4),  
69 DNA/RNA/vector-based vaccines encoding structural proteins (5-10) and purified  
70 viral-like particles (VLPs) (11, 12) or protein subunits (13, 14). Some of these  
71 candidates are currently undergoing phase 1 of clinical trial but the design of a  
72 successful ZIKV vaccine is complicated by the close relation of ZIKV with other  
73 flaviviruses and especially dengue virus (DENV), also transmitted by *Aedes* mosquito  
74 vectors and overlapping across many areas.

75  
76 ZIKV genome, like other members of the *Flaviviridae* family, is composed of a positive  
77 strand RNA encoding a single polyprotein that is cleaved into structural (capsid,  
78 precursor-membrane and envelope) and non-structural proteins (NS1, NS2, NS3, NS4  
79 and NS5). The envelope (E) glycoprotein, with its three domains (DI, DII and DIII), is  
80 the main target of the host immune response (15). During the initial stages of flavivirus  
81 genesis, the E protein is associated with the precursor-membrane protein (prM) and  
82 assumes a trimeric conformation; only during the passage in the trans-Golgi network,  
83 where the viral particle encounters an acidic environment, the trimers dissociate to re-  
84 assemble as dimers (16). This new conformation is necessary to allow furin-mediated  
85 cleavage of prM into pr and M generating a mature E dimer (17). Once released in the  
86 extracellular environment, pr dissociates and the particle becomes infectious. During  
87 infection, the low pH of the endosome triggers a new conformational modification that  
88 mediates fusion of viral and endosomal membranes (18). However, the particle  
89 maturation process is often incomplete releasing a viral progeny partially displaying E  
90 protein in trimers containing prM. In addition, E protein is in continuous dynamic  
91 motion, a phenomenon called “virus breathing” that is strain- and temperature-  
92 dependent (19). These two factors - incomplete maturation and viral breathing - have  
93 important consequences on epitope accessibility. At its tip, DII harbours the fusion  
94 loop (FL) represented by an amino acid sequence that is highly conserved among  
95 flaviviruses. FL is masked by DI and DIII when E protein on the virion is in a dimeric  
96 form but becomes exposed upon re-arrangement of E in the acidic endosome  
97 following cell entry. Epitopes located on DI/DII, especially in the FL region (FLE), are  
98 immuno-dominant but recognized by cross-reactive and poorly neutralizing antibodies  
99 (20, 21). This class of antibodies can be responsible for antibody-dependent

100 enhancement (ADE) of infection where antibody-bound virus particles are  
101 endocytosed via the Fcγ receptor, leading to a more severe infection (22). Antibodies  
102 to prM also contribute to ADE (22).

103 In addition, the most potent neutralizing antibodies often recognize complex  
104 quaternary epitopes than bind to multiple adjacent E proteins, epitopes that are  
105 available only when the E protein is assembled in a viral particle and therefore could  
106 not be elicited upon immunization with subunits (23). Recently, a new class of  
107 quaternary epitopes, called the Envelope Dimer Epitopes (EDE), have been described  
108 (24). EDE epitopes are displayed when the E proteins form a head-to-tail dimeric  
109 conformation. Highly neutralizing antibodies recognizing EDE were discovered in the  
110 sera of DENV-infected patients but interestingly, they were also shown to efficiently  
111 neutralize ZIKV, both in *in vitro* and in *in vivo* experiments (25-27). Upon binding to  
112 pre-fusion E dimers, these antibodies can prevent the transition of E to a trimeric form  
113 and consequently abrogate membrane fusion and infection.

114 Here, we aimed to develop antigens for ZIKV vaccination that can drive the immune  
115 response preferentially against quaternary/complex epitopes, to increase the  
116 neutralizing potential. Our recent study demonstrated that the introduction of a  
117 disulphide bridge by A264C substitution can stabilize E in a covalent dimer (cvD)  
118 conformation (28). This structure reduces the exposure of the unwanted FLE in favour  
119 of EDE. We generated cvD forms of a soluble E (sE-cvD) and a virus-like particle  
120 (VLP-cvD). The latter is expected to present E predominantly in form of dimers,  
121 conferring a smooth surface to the particles. Vaccination of mice with these antigens  
122 afforded full protection from lethal ZIKV challenge. Moreover, in comparison to their  
123 WT counterparts, the cvD immunogens elicited antibodies that exhibited lower *in vitro*  
124 ADE of DENV, yellow fever virus (YFV) and West Nile virus (WNV). Our data

125 confirmed the potential of cvD mutation in generating an immune response against  
126 neutralizing conformational epitopes, and further identified VLP-cvD as the most  
127 promising candidate of the two cvD derivatives tested.

128

## 129 **Results**

130 **Design, expression and purification of E covalent dimer-based vaccines:** We  
131 focused on designing antigens that would elicit antibodies to the complex quaternary  
132 epitopes that span two or more ZIKV E molecules. Immunogens based on EDE have  
133 a great potential, but a stable dimeric conformation of E is not easy to achieve. For  
134 this reason, we used a strategy of generating a covalently stable dimeric form by  
135 introducing Ala to Cys mutation in DII (A264C) of E as described previously (28). The  
136 stable dimeric E generated is thus expected to enhance exposure of EDE and reduce  
137 presentation of the unwanted immune-dominant FL region in DII to the immune  
138 system.

139 We generated a V5 epitope-tagged soluble ZIKV E (sE; i.e. E lacking its stem and  
140 membrane anchor domains) in its wild-type form (sE-WT), and in the form of a  
141 covalently stabilised dimer (sE-cvD) containing the A264C mutation (Fig 1A) (28). In  
142 addition, we also generated wild type (WT) and cvD forms of ZIKV virus-like particles  
143 (VLPs) using plasmid constructs encoding the capsid anchor region (Ca) followed by  
144 the full-length prM and E (Fig 1C). These proteins were produced by transient  
145 transfection of Expi293F cells with the relevant constructs and subsequently purified  
146 from the cell medium as described in Methods. The purified sE proteins were analysed  
147 in SDS-PAGE gel under reducing and non-reducing conditions (Fig 1B). As expected,  
148 the sE-WT was visible exclusively in the monomeric form, with an apparent molecular

149 weight of ~50 kDa, while sE-cvD under non-reducing conditions had an apparent  
150 molecular weight corresponding to a dimer (~110 kDa) that could be reduced to a  
151 monomer upon incubation with DTT. A small amount of sE-cvD was seen in a  
152 monomeric form under non-reducing condition. VLPs were expressed in a similar  
153 fashion and purified as shown in Fig 1C. SDS-PAGE and western blot analysis  
154 confirmed the presence of dimeric E in VLP-cvD (~110 kDa) when analysed under  
155 non-reducing conditions, and this was reduced to a monomer in the presence of DTT  
156 (Fig 1D). We also observed two additional minor bands: one in the non-reducing gel  
157 where a higher molecular weight protein possibly representing a more complex  
158 aggregate of E, and an approximately 90 kDa protein in the reducing gel which is likely  
159 an intermediate product resulting from an incomplete thiol reduction. In contrast,  
160 monomeric E (~55 kDa) was found in the VLP-WT preparation under both reducing  
161 and non-reducing conditions. The molecular weight of E in the VLP preparations was  
162 higher than that of the two sE proteins (Fig 1B) on account of the presence of the stem  
163 and anchor sequences. As expected, the viral M (10 kDa) was also detected in both  
164 forms of VLPs. Protein M is the product of furin-mediated cleavage of prM (25 kDa)  
165 during maturation of virus particles. The presence of M protein in the absence of prM  
166 suggested that in VLP-cvD the mutated glycoprotein underwent a complete maturation  
167 process during its synthesis, yielding smooth particles bearing the cvD E protein.  
168 Instead, the VLP-WT preparation contained residual prM implying that they were not  
169 fully matured (Fig 1E). Electron micrographs (Fig 1F) of both types of VLPs showed  
170 particles of around 50 nm comparable to the size of infectious ZIKV particles (29).

171

172 **Antibodies generated by cvD immunogens are conformation-sensitive:** ZIKV  
173 cannot infect immuno-competent mice due to its inability to counteract murine

174 interferon response (30). We therefore used the interferon receptor-deficient  
175 transgenic knock-out (*Ifnar1<sup>-/-</sup>*) A129 mice, which are susceptible to ZIKV infection and  
176 which have been shown to be amenable to vaccine evaluation studies (31). A cohort  
177 each of 4 weeks-old mixed male and female animals (n=6) were vaccinated with sE-  
178 WT, sE-cvD, VLP-WT, VLP-cvD, or PBS (as control). Three doses of 10 µg (sEs) or 2  
179 µg (VLPs) of protein adjuvanted with ALUM (1%) combined with MPLA (5 µg) were  
180 administered by sub-cutaneous route as shown in Fig 2A. One week after the last  
181 dose, blood samples were tested for the presence of anti-E antibodies.

182 We first tested the serum antibodies for binding to biotinylated derivatives of ZIKV sE  
183 proteins fused in-frame with the Biotin-Acceptor Peptide (BAP). Specifically,  
184 recombinant sE-WT-BAP (monomer) or sE-cvD-BAP (dimer) co-expressed with the  
185 bacterial biotin ligase BirA (32, 33) (to allow *in vivo* mono-biotinylation) were used to  
186 quantify the titre of antibodies recognizing E in its monomeric or dimeric form.

187 A comparison of the binding levels showed that sE-cvD immunisation elicited  
188 antibodies titres against the dimer four times higher than those obtained with sE-WT.  
189 On the other hand, analysis of the sera from VLP-WT- and VLP-cvD-vaccinated  
190 animals by ELISA showed no significant changes in the levels of antibodies (Fig 2C).  
191 It should be noted that this ELISA format is not robust enough to discriminate  
192 antibodies binding to more complex epitopes.

193 In order to further characterise the types of antibodies elicited by our cvD antigens, we  
194 used a recently developed cytofluorimetry assay of cells displaying dimers of ZIKV sE  
195 protein (paper in submission). In this assay, the C-terminus of sE is fused to the trans-  
196 membrane and cytosolic tail of the type-I trans-membrane protein MHC- $\alpha$  for plasma  
197 membrane display of the protein, as previously reported (28). This assay has the



198 potential to discriminate antibodies binding exclusively to dimeric E on the basis of the  
199 pH-dependent mobility of E protein: at pH7, that resembles the neutral extracellular  
200 environment, the protein is in a dimeric conformation but at pH6, mimicking the  
201 conformational changes that occur in the acidic endosome vesicles during infection, it  
202 moves to a pre-fusion monomeric conformation. When exposed to a neutral pH (pH7),  
203 E can physiologically dimerize, and therefore be recognized by the dimer specific  
204 monoclonal antibody EDE 1C10 (24). However, this interaction is completely  
205 abrogated when cells are exposed to a lower pH (pH6), due to the disruption of the  
206 dimer. Thus, with this dimer-specific antibody two populations of cells can be detected  
207 by flow cytometry – antibody-bound and unbound – depending on the assay conditions  
208 (Fig 3A - EDE). On the other hand, antibodies binding to epitopes that do not require  
209 dimeric conformation of the protein are not affected by the pH and therefore show no  
210 differences in the binding capacity, as shown using in-house made monoclonal  
211 antibody DIII-1B (Fig 3A – DIII-1B), that recognizes a linear epitope located on domain  
212 III (S1 Figure). This assay is primarily designed, and indeed works optimally, for  
213 monoclonal antibodies. Nevertheless, we reasoned that it would still be useful in  
214 evaluating the nature of antibodies in sera from vaccinees containing a mix of IgGs  
215 capable of binding to linear or conformational epitopes. As shown in Fig 3B, serum  
216 antibodies from sE-WT- and VLP-WT-immunized groups (first and third columns,  
217 respectively) seemed to not be particularly affected in the binding by the pH-dependent  
218 change of conformation. In contrast, sera from sE-cvD- and VLP-cvD-vaccinated  
219 animals showed a more consistent pH-dependent difference in the relative peak  
220 positions (Fig 3B; second and fourth columns, respectively).

221 Taken together, the data suggest that cvD antigens elicited a population of antibodies  
222 more sensitive to changes in conformation than the one elicited by the WT  
223 immunisation.

224

225 **cvD antigens elicit neutralizing antibodies in mice:** A second immunisation was  
226 performed using the same procedure shown in Fig 2A. Antibody titres were measured  
227 using exclusively the sE-cvD-BAP ELISA (Fig 4A). The neutralizing capacity of these  
228 sera was then determined in a micro-neutralization (MN) assay that we had previously  
229 developed (9). This sandwich ELISA accurately measures the levels of glycoprotein E  
230 in infected cells thus enabling quantitation of virus infectivity. Vero cells were infected  
231 with the Puerto Rican ZIKV strain PRVABC59 (an Asian lineage isolate) that had been  
232 pre-incubated for 1 hour with serially diluted mouse sera. Three days post-infection  
233 the level of cellular E protein was determined by the sandwich ELISA. Percentage of  
234 infectivity was calculated relative to E yield in cells infected in absence of sera. As  
235 shown in Fig 4B, antibodies elicited by VLP-WT or VLP-cvD neutralized virus infection  
236 significantly more strongly than their respective sE counterparts. Both the cvD  
237 antigens consistently produced higher (although not statistically significant) *in vitro*  
238 neutralization titres than their WT counterparts (Fig 4B). Sera from control group  
239 animals did not neutralize virus infectivity.

240

241 **cvD immunogens protect mice from ZIKV challenge:** To assess *in vivo* efficacy of  
242 our candidate vaccines, we challenged a group of immunised animals with live virus.  
243 Analysis of their sera post-immunization confirmed the superiority of the cvD antigens  
244 in eliciting neutralizing antibodies (S2 Fig). Animals were challenged subcutaneously

245 with  $10^4$  pfu of ZIKV PRVABC59 after three immunisations with ZIKV antigens or PBS,  
246 as shown in Fig 5A. A scoring system was used to monitor the progress of the disease,  
247 based on severity of clinical signs and symptoms, as described in S1A Table. A score  
248 of 3 was considered as the humane endpoint. Animals were monitored for 9 days for  
249 their body weight changes (Fig 5B) and clinical signs (S1B Table). The PBS control  
250 group started losing weight at 4 days post-challenge (dpc) and subsequently exhibited  
251 clinical signs of infection and were euthanized at 7-8 dpc (Figs. 5B and C, grey lines).  
252 The sE-WT group lost less weight but exhibited clinical signs comparable to those  
253 seen in the PBS control group although at delayed onset (Figs. 5B and C, orange  
254 lines). One mouse of the sE-WT group succumbed to infection. A similar profile of  
255 weight change, clinical scores and survival were observed in VLP-WT group (Figs. 5B  
256 and C red lines) compared to the sE-WT group. Importantly, all animals immunised  
257 with cvD antigens survived the challenge, maintained a more stable weight profile and  
258 showed rapid recovery from the clinical signs of infection (Figs. 5B and C, purple and  
259 blue lines). Viremia was determined by RT-qPCR on blood samples taken at days 2,  
260 3, 4 and 7 during the course of the challenge (Figs. 5D and E). Since the limit of the  
261 assay was determined as a titre of  $10^2$  pfu equivalent/mL, for statistical analysis this  
262 value was given to all the samples that were below the limit of detection. As expected,  
263 PBS control mice showed very high viremia ( $>10^6$  pfu/mL) which peaked at 3 dpc. In  
264 contrast, in all vaccinated animals the viremia peaked at 4 dpc, although the levels  
265 varied. Specifically, the sE-WT-vaccinated animals displayed levels comparable to  
266 those observed in the PBS control group ( $>10^5$  pfu equivalent/mL). Instead, consistent  
267 reduction in viremia levels was observed in VLP-WT-, sE-cvD- and VLP-cvD-  
268 vaccinated animals which in the latter two groups was significant. In particular, the  
269 geometric mean of viral titre of  $4 \times 10^2$  pfu equivalent/mL was the lowest in VLP-cvD-

270 vaccinated group. Relative organ viral load was analysed by RT-qPCR of viral RNA  
271 extracted from brain, spleen and sex organs, which were collected immediately after  
272 euthanasia (Fig 5F).  $\Delta\Delta\text{CT}$  method was used to calculate the titre relative to an  
273 average of PBS control group. Although all four antigens reduced brain viral load, only  
274 cvD antigens reduced that of the sex organs. In case of spleen viral transmission, sE-  
275 cvD and VLP-cvD were better than sE-WT and control group whereas VLP-WT was  
276 only better than control group. All together, these data confirmed the unsuitability of  
277 wild-type antigens (especially sE-WT) whereas both cvD derivatives conferred full  
278 protection against ZIKV infection *in vivo*.

279

280 **cvD reduces *in vitro* ADE:** Due to the close relationship with DENV and other  
281 mosquito-borne flaviviruses, a ZIKV vaccine is very likely to elicit cross-reactive  
282 antibodies that may fail in neutralizing other flavivirus infection and instead lead to a  
283 worse disease outcome. Our candidate vaccines are designed in order to reduce this  
284 risk, limiting exposure of highly cross-reactive but low cross-neutralising epitopes in  
285 favour of broadly neutralizing antibodies. We performed an *in vitro* ADE assays using  
286 the K562 monocyte cell line that expresses the Fc $\gamma$ -receptor. Infection of these cells  
287 occurs only in presence of antibodies opsonizing the virus and therefore mediating the  
288 entry through the Fc $\gamma$ -receptor internalization. Viruses, pre-incubated with ten-fold  
289 serial dilutions of the sera were added to the cells, incubated for three days, and then  
290 analysed to determine the percentage of infection by cytofluorimetry. Experiment was  
291 performed in triplicate. (Fig 6).

292 We used ZIKV as a control in the assay and as expected all the sera gave the same  
293 pattern of infection, suggesting that the four groups of sera have a similar capacity to

294 bind to ZIKV and therefore mediate infection. When tested against the four DENV  
295 serotypes, YFV and WNV, sera from the sE-WT group showed a percentage of  
296 infected cells between 50 and 100. Instead, 10 times lower levels of infection were  
297 observed with sE-cvD sera, suggesting a much lower level of cross-reacting  
298 antibodies. Similarly, sera from VLP-cvD-immunised mice exhibited a 10-fold reduced  
299 infectivity compared to sera from VLP-WT animals. Particularly interesting was the  
300 level of infected cells obtained after incubation with VLP-WT sera, which was  
301 significantly higher than the infection obtained with the sera from sE-cvD and VLP-  
302 cvD immunisations. These results suggest that the covalent dimer-based E vaccines  
303 (both, sE-cvD and VLP-cvD) confer a lower risk of ADE in comparison to their WT  
304 counterparts as determined by this experimental model.

305

306 **VLP-cvD protection coverage includes ZIKV African lineage:** ZIKV has diverged  
307 decades ago into two lineages, the African and the Asian. Where the Asian lineage is  
308 responsible for the last epidemics and is linked to neurological outcomes and birth-  
309 defects, the African lineage is -intriguingly- well known to be more pathogenic in *in*  
310 *vivo* models (35). Since a safe ZIKV vaccine should guarantee coverage of both  
311 African and Asian lineages, we tested the VLP-cvD protectivity upon infection with a  
312 Ugandan (MP1751) isolate of ZIKV. Immunization and challenge were performed as  
313 previously described (Figs 2A and 5A). The PBS group lost weight starting from day 3  
314 post-challenge and all mice reached the endpoint at day 6 (Figs 7A/B, grey lines. S2  
315 Table). VLP-cvD-vaccinated group instead showed a stable body weight and all animal  
316 survived the challenge (Figs 7A and B, blue lines). PBS-immunised-control mice  
317 showed high peak of viremia ( $>10^7$  pfu/mL) at 4 dpc while the vaccinated mice showed  
318 a highly significant reduction in viremia ( $\sim 10^2$  pfu/mL) (Fig 7C). Also, virus

319 dissemination to the brain was suppressed in the VLP-cvD immunized mice (Fig 7D).

320 All together, these results confirm the broadly protective potential of our vaccine

321 candidate.

322

## 323 **Discussion**

324 Monoclonal antibodies recognizing quaternary epitopes that span on more than one E

325 protein are reported to be the most neutralizing and cross-reactive class of antibodies

326 (24, 36, 37). Nevertheless, they constitute only a minority of the antibodies elicited by

327 a natural infection, where the larger response focuses on poorly neutralizing and

328 cross-reactive epitopes located on DI/DII (15, 38). The incomplete maturation of

329 particles and the mobility of E reduce their exposure, especially to dimeric epitopes, in

330 favour of the Fusion-Loop epitope. However, our vaccines are designed in order to

331 lock E in a dimeric conformation, impairing its disassembly and forcing the protein to

332 display the desired epitopes.

333

334 E-homodimer stability was proved several times to be affected by temperature:

335 dimerization is favoured at 28°C and reduced at 37°C, hence physiological

336 temperature is another element that contributes to impair dimers exposure to the

337 immune system (39). But 28°C is also a crucial temperature for expression and

338 secretion of E protein, both in the soluble form but also as part of VLPs (28). Since this

339 temperature is not compatible with genetic vaccination approaches, in which DNA or

340 RNA encoding the antigen is administered and the antigen is then produced by the

341 host cells at physiological temperature, the full potential of our antigens as candidate

342 vaccines was evaluated in a protein-based vaccination approach.

343

344 Recently, a characterization of two dimeric E antigens was published, dimerization  
345 was achieved by the A264C mutation or replacing the E transmembrane domain with  
346 the FC fragment of a human IgG (40). While this manuscript was under preparation,  
347 two other articles reported development and evaluation of dimer-based subunit  
348 vaccines similar to that described in here (41, 42). The authors showed that in all three  
349 cases the antigens were able to induce in mice the production of neutralizing  
350 antibodies. However, our work is the first application of E covalent dimers to virus-like  
351 particles that proved in our hands to be a vaccine candidate superior to the soluble  
352 dimer.

353

354 We tested the potential of E covalent-dimers when expressed in the form of soluble  
355 protein, lacking the stem-anchor, and also as VLP. In comparison with sE-WT we  
356 observed a dramatic effect of the cvD mutation on the immune response, with a drastic  
357 reduction of antibodies binding to monomeric E and an impressive increase in  
358 protective activity upon lethal challenge. When the comparison was performed with  
359 the VLPs, the effect was less dramatic in terms of anti-dimer antibody titres. This is  
360 likely due to the thermal stability of dimers that is higher in ZIKV than in DENV (43),  
361 ZIKV E dimers are more stable, as already proven by the necessity of a double  
362 disulphide bridge to lock DENV E dimer when one bridge is sufficient in ZIKV E. In  
363 addition, our ELISA and binding assays are based on E subunits presented in a  
364 monomeric or dimeric form but cannot fully recreate the complex symmetry of E  
365 protein on the viral particles therefore cannot quantify the contribution of antibodies  
366 binding to adjacent dimers. However, the difference in antibody response and  
367 protectivity was enough to achieve an important reduction in DENV ADE. In this regard  
368 it is noteworthy that the VLP-cvD lacked prM indicating their complete maturation. In

369 contrast, VLP-WT contained prM that can elicit anti-prM antibodies upon vaccination.  
370 The prM protein is naturally present in DENV or ZIKV particles, due to incomplete  
371 maturation, but prM antibodies from DENV patients showed no or poor neutralizing  
372 activity and may instead likely induce ADE (44). All together these observations  
373 strongly suggest that covalently linked E dimer can bring even higher benefits to the  
374 development of a DENV vaccine.

375

376 The development of a ZIKV vaccine requires attention to the possible cross-reaction  
377 with DENV. ADE of infection between different DENV serotypes is widely recognised  
378 as the cause of dengue shock syndrome (DSS) but the role that infection may play at  
379 any point in influencing DENV infections is still unclear. So far animal models have not  
380 been able to replicate the full repertoire of the antibody response in humans. In  
381 addition, it is difficult to reproduce severe DENV infection in animal models; in most  
382 cases the severity of infection is based on increased viremia in the infected animals.  
383 *In vitro* tests performed with DENV-positive sera or DENV monoclonal antibodies  
384 showed cross-reactivity and ADE of ZIKV infection, similar to experiments performed  
385 in mouse models (20, 45-47). In other cases analysis performed in non-human primate  
386 models ruled out a negative effect of previous DENV exposure on ZIKV infection (48),  
387 which was later confirmed by population studies with asymptomatic ZIKV infection in  
388 subjects positive for DENV antibodies (49). Concerns of cross-reaction and ADE were  
389 also raised about vaccination against other flaviviruses. *In vitro* studies supported  
390 negligible risk of ADE of ZIKV after tick-borne encephalitis virus vaccination and no  
391 clinical evidence of increased disease severity in vaccinated people has emerged so  
392 far (50). The fear of predisposing vaccinated individual to DSS generated a reluctance  
393 to deploy the YFV vaccine in DENV endemic areas, but a recent long-term study



394 showed no evidence of increased risk (51). However, the sequence homology  
395 between ZIKV and DENV is high with elevated antibody cross-reactivity (15, 20) and  
396 how ZIKV vaccination can affect DENV pathogenesis is a pertinent question.

397

398 We evaluated the ADE potential (on DENV, YFV and WNV) of the different sera using  
399 K562 cells, which by expressing high levels of FcγRIIA, significantly favours FcγR-  
400 mediated infection, making these cells particularly prone for ADE-mediated infection.  
401 In contrast to sera of sE-WT vaccinated animals that showed high level of cross-  
402 reaction, ADE was strongly reduced when E was locked in the dimeric form (sE-cvD)  
403 and properly folded, likely because of the exposure of conserved and poorly  
404 neutralising epitopes on DI/DII. The most interesting results were provided by the  
405 comparison between WT and cvD VLPs. Such containing un-mutated E, despite being  
406 the major candidate exploited so far and being able to sufficiently protect mice from  
407 lethal infection, induced *in vitro* ADE at a level comparable to sE-WT, or even higher  
408 as in the case of DENV1 and DENV4. This raises safety concerns about a vaccine  
409 that, despite protecting from ZIKV infection, may bring more adverse effects on  
410 subsequent DENV infections. Once again, this risk is reduced with the VLP-cvD  
411 antigen. However, to what extent ADE *in vitro* mimics any *in vivo* effects remains to be  
412 determined.

413

414 ADE of DENV upon ZIKV immunisation is a risk that cannot be underestimated, and  
415 the development of engineered, safe vaccine is probably an essential requirement to  
416 tackle this concerning public health challenge. Our two immunogens proved the high  
417 potential of engineered E protein locked in a dimeric conformation as a suitable

418 vaccine candidate, with the most promising results achieved when the protein is part  
419 of a structurally more complex antigen presented in the form of a virus-like particle.

420

## 421 **Material and Methods**

422 **Cell lines and virus strains:** Expi293F (Thermo Fisher Scientific) embryonic human  
423 kidney adapted to serum-free conditions) cells were grown in Expi293™ Expression  
424 Medium as per the manufacturers' protocol. Vero E6 cells were grown in Dulbecco's  
425 Modified Eagle's Medium (DMEM) (Life Technologies) containing 10% fetal bovine  
426 serum (FBS) (Life Technologies) and penicillin-streptomycin (Gibco), K562 cells were  
427 grown in Roswell Park Memorial Institute (RPMI) 1640 medium (Life Technologies)  
428 containing 10% Fetal Bovine Serum (FBS) (Life Technologies). ZIKV PRVABC59  
429 (kindly supplied by BEI Resources; Accession Number KX087101) and ZIKV MP1751  
430 (005V-02871; kindly supplied by Public Health England: Accession Number  
431 KY288905.1) were used for infection experiments, micro-neutralisation and animal  
432 challenge.

433

434 **Plasmid DNA constructs:** ZIKV sE-encoding sequence (codon 1-404) was amplified  
435 from ArD158095 strain (Accession number KF383121.1) as described in Sloan  
436 Campos et al<sup>(28)</sup>. sE fused to a N-terminal immunoglobulin leader sequence (sec) and  
437 a C-terminal V5 tag (GKPIPPLLFLD) was cloned into a pVax vector. A mammalian  
438 codon-optimized ZIKV prME gene sequence, flanked by the C-terminal portion of C  
439 and the N-terminal residue of NS1, was obtained from ZIKV PE243 Brazilian strain  
440 (Accession number KX197192.1<sup>(52)</sup>) (aa 105-815 of the polyprotein)<sup>(52)</sup> and cloned into a  
441 pDIs vector. The A264C mutation was introduced by site-directed mutagenesis into  
442 both plasmids.

443

444 **Protein expression and purification:** sE-WT, sE-cvD, VLP-WT and VLP-cvD were  
445 expressed using ExpiFectamine™ 293 Transfection Kit (Thermo Fisher Scientific)  
446 following manufacturer's instructions. After 16 hours, cells were moved to 28°C. At 5  
447 days post-transfection the supernatant was harvested and filtered. sE proteins were  
448 purified using the V5-tagged Protein Purification Gel (Caltag Medsystems Ltd) eluting  
449 with 2 mg/mL of V5 peptide. VLPs, they were pelleted down by ultracentrifugation  
450 (115,000 g, 4°C, 2 hours) (Sorvall discovery 90SE with Surespin630 rotor) through a  
451 cushion of 20% sucrose in TN Buffer (20 mM Tris and 120 mM NaCl). The pellet was  
452 re-suspended in TN buffer and loaded on discontinuous density gradient made by  
453 sodium potassium tartrate and glycerol in TN buffer (29). Tartrate concentration  
454 ranged from 10 to 30% with interval of 5% whilst that of glycerol ranged from 7.5 to  
455 22.5% with interval of 3.75%. After centrifugation (Sorvall discovery 90SE with TH641  
456 rotor) at 175,000 g, 4°C, 2 hours, fractions were collected and analysed for the  
457 presence of ZIKV E by western blot. ZIKV E protein-positive fractions were pooled,  
458 dialysed against Dulbecco's phosphate-buffered saline (DPBS) (Life Technologies)  
459 and concentrated using spin column (Amicon® Ultra-15 (100 kDa), Merck Millipore)  
460 before being subjected to size-exclusion chromatography. Briefly, ~500 µL of  
461 concentrated pooled fractions was loaded onto HiPrep 16/60 Sephacryl S-500 HR  
462 column (GE Healthcare) then 1.5 column volume of mobile phase (DPBS) was run  
463 through the column at flow rate of 0.5 mL/min using the AKTA Pure (GE Healthcare)  
464 system. Fractions were collected and tested for ZIKV E protein. Positive fractions were  
465 pooled and concentrated using the Amicon® Ultra-15 (100 kDa; Merck Millipore) spin  
466 column. The concentration of the purified proteins was determined using  
467 NanodropOne (ThermoScientific).

468

469 **SDS-PAGE and western blot:** sE samples were subjected to 10% SDS-PAGE, and  
470 the fractionated proteins detected by direct staining of the gel with InstantBlue (Sigma)  
471 or by western blot. VLP samples were separated by 10% or 14% SDS-PAGE later  
472 blotted to PVDF membrane (Immobilon®-FL, Merck Millipore) and blocked overnight  
473 with ODYSSEY® blocking buffer, LI-COR then incubated DIII1B antibody (anti-ZIKV  
474 E DIII generated in-house as described in S1 Figure) or ZIKA prM antibody (GeneTex)  
475 for 1 hour followed by anti-mouse IgG (IRDye® 800CW, LI-COR) and anti-rabbit IgG  
476 (IRDye® 680RD, LI-COR). Images were acquired by LICOR machine.

477

478 **Electron microscopy:** VLPs were adsorbed for 3 min to Formvar carbon films  
479 mounted on 400 mesh per inch copper grids (Agar Scientific). Samples were washed  
480 three times with distilled water and stained with 2% saturated uranylacetate (Agar  
481 Scientific) for 2 min at room temperature. Specimens were analysed in a transmission  
482 electron microscope (JEM-1200 EX II, JEOL) equipped with a CCD camera (Orius,  
483 Gatan) at an acceleration voltage of 80 kV.

484

485 **Animal immunisation:** Four-week old male and female *Ifnar1<sup>-/-</sup>* mice (A129, 129S7  
486 background; Marshall BioResources) (n=6) were subcutaneously immunised with  
487 ZIKV antigen formulated in aluminium hydroxide gel (1% ALUM, Brenntag) combined  
488 with 5 µg monophosphoryl lipid A (MPLA)(InvivoGen) or PBS containing the adjuvant.  
489 Purified sE antigens used in each immunisation contained 10 µg protein whilst it was  
490 2 µg in case of VLPs. Mice were immunised at 0, 2 and 3 weeks and bled 4 weeks  
491 after primary immunisation for antibody titration and micro-neutralisation assay. Four  
492 weeks after primary immunisation, mice were challenged subcutaneously with 10<sup>4</sup> pfu

493 of Puerto Rican ZIKV (PRVABC59) or Uganda ZIKV (MP1751). Blood was collected  
494 at 2, 3, 4 and 7 dpc and 10 µL of sera were assessed by RT-qPCR. Mice were  
495 euthanised when they exhibited three or more signs of moderate severity or lost more  
496 than 15% body weight, otherwise 9/10 days after challenge.

497

## 498 **Animal Ethics**

499 All animal research described in this study was approved by the University of Glasgow  
500 Animal Welfare and Ethical Board and was carried out under United Kingdom Home  
501 Office Licenses, P9722FD8E, in accordance with the approved guidelines and under  
502 the UK Home Office Animals (Scientific Procedures) Act 1986 (ASPAs).

503

504 **ELISA:** Recombinant biotinylated proteins (sE, sE-cvD and DIII) were expressed at  
505 28°C using ExpiFectamine™ 293 Transfection Kit (Thermo Fisher Scientific). Cell  
506 supernatant was harvested and dialyzed. Biotinylated proteins were captured in ELISA  
507 plates pre-coated with 5 µg/mL of Avidin (Sigma) in Na<sub>2</sub>CO<sub>3</sub>/NaHCO<sub>3</sub> buffer pH 9.6,  
508 subsequently blocked with PBS containing 0.05% Tween-20 and 1% bovine serum  
509 albumin (BSA-Sigma). Serial dilutions of mouse sera were tested for binding to the  
510 biotinylated proteins and the bound antibodies detected using HRP-conjugated anti-  
511 mouse IgG A4416 (Sigma) and TMB substrate (Life Technologies).

512

513 **Antibody binding assay:** This assay was performed as previously described in  
514 (paper in submission). HEK cells stably expressing ZIKV sE protein on the surface  
515 were blocked in 1% BSA in PBS at pH 6 or 7 and then incubated with mouse sera  
516 diluted 1:500 in the same solution. After wash, cells were incubated with secondary

517 anti-mouse Alexa 488 (Jackson Immunoresearch) 1:50000 in 1% BSA PBS pH 7 and  
518 analysed by cytofluorimetry in a FACSCalibur (BD Biosciences).

519

520 **Micro-neutralisation (MN) assay:** This assay was performed as described in Lopez-  
521 Camacho et al (9). Briefly,  $7 \times 10^3$ /well of Vero cells were seeded in 96-well plates and  
522 incubated at 37 °C in 5% CO<sub>2</sub>. Next day, three-fold serially diluted mice sera were first  
523 incubated at 37°C for 1 hour with 100 pfu/well ZIKV strain PRVABC57. The  
524 serum/virus mix was then used to infect cells. After 1 hour of incubation at 37 °C,  
525 100 µL of medium was added to each well. At day 3 post-infection, cells were lysed in  
526 lysis buffer (20 mM Tris-HCl [pH 7.4], 20 mM iodoacetamide, 150 mM NaCl, 1 mM  
527 EDTA, 0.5% Triton X-100 and Complete protease inhibitors) and the viral E protein  
528 quantitated by sandwich ELISA (see below). The amount of E protein detected  
529 correlates with the level of virus infectivity which was presented as % of ZIKV infectivity  
530 relative to the control (i.e., virus not pre-incubated with immune sera). The MN<sub>50</sub> titre  
531 was defined as the serum dilution that neutralised ZIKV infection by 50%.

532

533 **Sandwich ELISA to assess ZIKV infectivity:** ELISA plates were coated with 3 µg/mL  
534 of purified pan-flavivirus MAb D1-4G2-4-15 (ATCC® HB112TM) in PBS and incubated  
535 overnight at RT and subsequently blocked for 2 hours at RT with PBS containing  
536 0.05% Tween-20 and 2% skimmed milk powder. After washing with PBST, ZIKV-  
537 infected cell lysates were added and incubated for 1 hour at RT. Wells were washed  
538 with PBST, incubated with anti-ZIKV E polyclonal R34 IgG (9) at 6 µg/ml in PBST for  
539 1 hour at RT and washed again. Antibodies bound to ZIKV envelope protein were  
540 detected using HRP conjugate anti-rabbit IgG 7090 (Abcam) and TMB substrate (Life  
541 Technologies).

542

543 **Quantitation of viral RNA by RT-qPCR:** Viral RNA was extracted from 10  $\mu$ L of  
544 mouse sera using QIAamp® viral RNA Mini Kit (Qiagen) or about 20 mg of organs  
545 homogenised by Precellys Lysing Kit Hard tissue grinding (Bertin Technologies) using  
546 RNeasy viral mini kit. The viral load was measured by RT-qPCR using One-Step  
547 SYBR® Primescript™ RT-PCR kit II (Takara). CT values of serum samples were used  
548 to calculate serum viral titre according to regression equation built by RNA extracted  
549 from 10  $\mu$ L of  $10^2$ - $10^6$  pfu/mL of ZIKV (PRVABC59 or MP1751). In case of relative  
550 organ viral load, CT values of ZIKV gene and internal control B2M gene were used for  
551 calculating  $\Delta$ CT values. Average  $\Delta$ CT of PBS-injected mice was used as reference to  
552 calculate  $\Delta\Delta$ CT value. Primers pair for PRVABC59 ZIKV gene was Forward:5'-  
553 GTTGTCGCTGCTGAAATGGA-3' and Reverse:5'-GGGGACTCTGATTGGCTGTA-  
554 3'. Primers pair for MP1751 ZIKV gene was Forward:5'-  
555 ACTTCCGGTGCGTTACATGA-3' and Reverse:5'-GGGCTTCATCCATGATGTAG-3'.  
556 Primers pair for the B2M genes was Forward: 5'-CGGCCTGTATGCTATCCAGA-3'  
557 Reverse: 5'-GGGTGAATTCAGTGTGAGCC -3'.

558

559 **ADE assay:** Ten-fold serial dilutions of pooled sera were mixed with  $4 \times 10^3$  pfu of each  
560 virus and incubated for 1.5 hour at 37 °C before mixing with  $4 \times 10^4$  K562 cells. After  
561 incubation at 37°C for 2 days (for WNV) or 3 days (all other viruses), cells were fixed  
562 with 2% PFA for 30 min and then washed in PBS. Blocking and permeabilization buffer  
563 (0.1% saponine, 2 % FBS, 0.1% NaN<sub>3</sub> in PBS) was added to cell for 30 min at 4 °C.  
564 Cells are incubated with mAb 4G2 (1  $\mu$ g/mL) for 1hour at 4 °C followed by secondary  
565 anti-mouse Alexa 488 (Jackson Immunoresearch, 1:50000). After washing with PBS,

566 cells are re-suspended in blocking buffer without saponine and analysed by  
567 cytofluorimetry in a FACSCalibur (BD Biosciences).

568

569 **Statistical analysis:** Normality was determined by Ryan-Joiner Normality test with  
570 Minitab Software. Statistical analysis was done as indicated in figure legends, with  
571 Minitab or GraphPad Prims softwares. \* $p < 0.05$ , \*\* $p < 0.01$ , \*\*\* $p < 0.001$ .

572

### 573 **Acknowledgment**

574 We thank Marion McElwee and James Streetley for help with imaging VLPs by  
575 electron microscopy. We acknowledge the provision of ZIKV strains PRVABC59 and  
576 MP1751 (005V-02871) by BEI Resources and Public Health England/EVAg,  
577 respectively. This research is funded by the Department of Health and Social Care  
578 using UK Aid funding and is managed by the NIHR (AHP and AK); the UK Medical  
579 Research Council (MC\_UU12014/2 and MC\_UU\_12014/8) (AHP and AK). The views  
580 expressed in this publication are those of the author(s) and not necessarily those of  
581 the Department of Health and Social Care. This project was also partially funded  
582 through the European Union's Horizon 2020 research and innovation programme  
583 under ZikaPLAN grant agreement No 734584 (JME). The funders had no role in study  
584 design, data collection and analysis, decision to publish, or preparation of the  
585 manuscript.

586

### 587 **Author contribution**

588 The CVR has adopted the CRediT taxonomy (<https://casrai.org/credit/>). Authors'  
589 contribution is as follows. GDL: conceptualization, data curation, formal analysis,  
590 investigation, project administration, methodology, supervision, validation,



591 visualization, writing - original draft, writing - review & editing; RT: data curation, formal  
592 analysis, investigation, validation, visualization, writing – original draft, writing review  
593 & editing; JD: data curation, investigation, writing - review & editing; CS: investigation,  
594 visualization, writing - review & editing; MP: investigation, methodology, validation,  
595 writing - review & editing; RS: investigation, writing - review & editing; HES: resources,  
596 writing - review & editing; JME: resources, writing - review & editing; AK: funding  
597 acquisition, resources, writing - review & editing; JB: resources, writing - review &  
598 editing; ORB: conceptualization, resources, writing - original draft, writing - review &  
599 editing, AHP: conceptualization, funding acquisition, project administration, resources,  
600 supervision, writing - original draft, writing - review & editing.

601

## 602 **Competing interests**

603 The authors declare no competing interests.

604

## 605 **References**

- 606 1. Munoz LS, Barreras P, Pardo CA. Zika Virus-Associated Neurological Disease in the Adult:  
607 Guillain-Barre Syndrome, Encephalitis, and Myelitis. *Seminars in reproductive medicine*.  
608 2016;34(5):273-9.
- 609 2. Mlakar J, Korva M, Tul N, Popovic M, Poljsak-Prijatelj M, Mraz J, et al. Zika Virus Associated  
610 with Microcephaly. *The New England journal of medicine*. 2016;374(10):951-8.
- 611 3. D'Ortenzio E, Matheron S, Yazdanpanah Y, de Lamballerie X, Hubert B, Piorkowski G, et al.  
612 Evidence of Sexual Transmission of Zika Virus. *The New England journal of medicine*.  
613 2016;374(22):2195-8.
- 614 4. Abbink P, Larocca RA, De La Barrera RA, Bricault CA, Moseley ET, Boyd M, et al. Protective  
615 efficacy of multiple vaccine platforms against Zika virus challenge in rhesus monkeys. *Science*.  
616 2016;353(6304):1129-32.
- 617 5. Chahal JS, Fang T, Woodham AW, Khan OF, Ling J, Anderson DG, et al. An RNA nanoparticle  
618 vaccine against Zika virus elicits antibody and CD8+ T cell responses in a mouse model. *Sci Rep*.  
619 2017;7(1):252.
- 620 6. Dowd KA, Ko SY, Morabito KM, Yang ES, Pelc RS, DeMaso CR, et al. Rapid development of a  
621 DNA vaccine for Zika virus. *Science*. 2016;354(6309):237-40.
- 622 7. Larocca RA, Abbink P, Peron JP, Zanotto PM, Iampietro MJ, Badamchi-Zadeh A, et al. Vaccine  
623 protection against Zika virus from Brazil. *Nature*. 2016;536(7617):474-8.
- 624 8. Pardi N, Hogan MJ, Pelc RS, Muramatsu H, Andersen H, DeMaso CR, et al. Zika virus protection  
625 by a single low-dose nucleoside-modified mRNA vaccination. *Nature*. 2017;543(7644):248-51.

- 626 9. Lopez-Camacho C, Abbink P, Larocca RA, Dejnirattisai W, Boyd M, Badamchi-Zadeh A, et al.  
627 Rational Zika vaccine design via the modulation of antigen membrane anchors in chimpanzee  
628 adenoviral vectors. *Nat Commun.* 2018;9(1):2441.
- 629 10. Griffin BD, Muthumani K, Warner BM, Majer A, Hagan M, Audet J, et al. DNA vaccination  
630 protects mice against Zika virus-induced damage to the testes. *Nat Commun.* 2017;8:15743.
- 631 11. Boigard H, Alimova A, Martin GR, Katz A, Gottlieb P, Galarza JM. Zika virus-like particle (VLP)  
632 based vaccine. *PLoS Negl Trop Dis.* 2017;11(5):e0005608.
- 633 12. Garg H, Sedano M, Plata G, Punke EB, Joshi A. Development of Virus like Particle Vaccine and  
634 Reporter Assay for Zika Virus. *J Virol.* 2017.
- 635 13. Han JF, Qiu Y, Yu JY, Wang HJ, Deng YQ, Li XF, et al. Immunization with truncated envelope  
636 protein of Zika virus induces protective immune response in mice. *Scientific reports.* 2017;7(1):10047.
- 637 14. Liang H, Yang R, Liu Z, Li M, Liu H, Jin X. Recombinant Zika virus envelope protein elicited  
638 protective immunity against Zika virus in immunocompetent mice. *PLoS One.* 2018;13(3):e0194860.
- 639 15. Heinz FX, Stiasny K. The Antigenic Structure of Zika Virus and Its Relation to Other Flaviviruses:  
640 Implications for Infection and Immunoprophylaxis. *Microbiol Mol Biol Rev.* 2017;81(1).
- 641 16. Yu IM, Zhang W, Holdaway HA, Li L, Kostyuchenko VA, Chipman PR, et al. Structure of the  
642 immature dengue virus at low pH primes proteolytic maturation. *Science.* 2008;319(5871):1834-7.
- 643 17. Stadler K, Allison SL, Schlich J, Heinz FX. Proteolytic activation of tick-borne encephalitis virus  
644 by furin. *Journal of virology.* 1997;71(11):8475-81.
- 645 18. Harrison SC. Viral membrane fusion. *Virology.* 2015;479-480:498-507.
- 646 19. Rey FA, Stiasny K, Vaney MC, Dellarole M, Heinz FX. The bright and the dark side of human  
647 antibody responses to flaviviruses: lessons for vaccine design. *EMBO Rep.* 2018;19(2):206-24.
- 648 20. Dejnirattisai W, Supasa P, Wongwiwat W, Rouvinski A, Barba-Spaeth G, Duangchinda T, et al.  
649 Dengue virus sero-cross-reactivity drives antibody-dependent enhancement of infection with zika  
650 virus. *Nat Immunol.* 2016;17(9):1102-8.
- 651 21. Beltramello M, Williams KL, Simmons CP, Macagno A, Simonelli L, Quyen NT, et al. The human  
652 immune response to Dengue virus is dominated by highly cross-reactive antibodies endowed with  
653 neutralizing and enhancing activity. *Cell Host Microbe.* 2010;8(3):271-83.
- 654 22. Dejnirattisai W, Jumnainsong A, Onsirisakul N, Fitton P, Vasanawathana S, Limpitikul W, et al.  
655 Cross-reacting antibodies enhance dengue virus infection in humans. *Science.* 2010;328(5979):745-8.
- 656 23. de Alwis R, Smith SA, Olivarez NP, Messer WB, Huynh JP, Wahala WM, et al. Identification of  
657 human neutralizing antibodies that bind to complex epitopes on dengue virions. *Proceedings of the*  
658 *National Academy of Sciences of the United States of America.* 2012;109(19):7439-44.
- 659 24. Dejnirattisai W, Wongwiwat W, Supasa S, Zhang X, Dai X, Rouvinski A, et al. A new class of  
660 highly potent, broadly neutralizing antibodies isolated from viremic patients infected with dengue  
661 virus. *Nat Immunol.* 2015;16(2):170-7.
- 662 25. Barba-Spaeth G, Dejnirattisai W, Rouvinski A, Vaney MC, Medits I, Sharma A, et al. Structural  
663 basis of potent Zika-dengue virus antibody cross-neutralization. *Nature.* 2016;536(7614):48-53.
- 664 26. Swanstrom JA, Plante JA, Plante KS, Young EF, McGowan E, Gallichotte EN, et al. Dengue Virus  
665 Envelope Dimer Epitope Monoclonal Antibodies Isolated from Dengue Patients Are Protective against  
666 Zika Virus. *MBio.* 2016;7(4).
- 667 27. Fernandez E, Dejnirattisai W, Cao B, Scheaffer SM, Supasa P, Wongwiwat W, et al. Human  
668 antibodies to the dengue virus E-dimer epitope have therapeutic activity against Zika virus infection.  
669 *Nat Immunol.* 2017;18(11):1261-9.
- 670 28. Slon Campos JL, Marchese S, Rana J, Mossenta M, Poggianella M, Bestagno M, et al.  
671 Temperature-dependent folding allows stable dimerization of secretory and virus-associated E  
672 proteins of Dengue and Zika viruses in mammalian cells. *Sci Rep.* 2017;7(1):966.
- 673 29. Sirohi D, Chen Z, Sun L, Klose T, Pierson TC, Rossmann MG, et al. The 3.8 Å resolution cryo-EM  
674 structure of Zika virus. *Science.* 2016;352(6284):467-70.
- 675 30. Rossi SL, Tesh RB, Azar SR, Muruato AE, Hanley KA, Auguste AJ, et al. Characterization of a  
676 Novel Murine Model to Study Zika Virus. *Am J Trop Med Hyg.* 2016;94(6):1362-9.

- 677 31. Dowall SD, Graham VA, Rayner E, Hunter L, Atkinson B, Pearson G, et al. Lineage-dependent  
678 differences in the disease progression of Zika virus infection in type-I interferon receptor knockout  
679 (A129) mice. *PLoS Negl Trop Dis*. 2017;11(7):e0005704.
- 680 32. Poggianella M, Slon Campos JL, Chan KR, Tan HC, Bestagno M, Ooi EE, et al. Dengue E Protein  
681 Domain III-Based DNA Immunisation Induces Strong Antibody Responses to All Four Viral Serotypes.  
682 *PLoS Negl Trop Dis*. 2015;9(7):e0003947.
- 683 33. Predonzani A, Arnoldi F, Lopez-Requena A, Burrone OR. In vivo site-specific biotinylation of  
684 proteins within the secretory pathway using a single vector system. *BMC Biotechnol*. 2008;8:41.
- 685 34. Rouvinski A, Dejnirattisai W, Guardado-Calvo P, Vaney MC, Sharma A, Duquerroy S, et al.  
686 Covalently linked dengue virus envelope glycoprotein dimers reduce exposure of the  
687 immunodominant fusion loop epitope. *Nature communications*. 2017;8:15411.
- 688 35. Dowall SD, Graham VA, Rayner E, Atkinson B, Hall G, Watson RJ, et al. A Susceptible Mouse  
689 Model for Zika Virus Infection. *PLoS Negl Trop Dis*. 2016;10(5):e0004658.
- 690 36. Fibriansah G, Tan JL, Smith SA, de Alwis R, Ng TS, Kostyuchenko VA, et al. A highly potent  
691 human antibody neutralizes dengue virus serotype 3 by binding across three surface proteins. *Nat*  
692 *Commun*. 2015;6:6341.
- 693 37. Fibriansah G, Tan JL, Smith SA, de Alwis AR, Ng TS, Kostyuchenko VA, et al. A potent anti-  
694 dengue human antibody preferentially recognizes the conformation of E protein monomers  
695 assembled on the virus surface. *EMBO Mol Med*. 2014;6(3):358-71.
- 696 38. Stettler K, Beltramello M, Espinosa DA, Graham V, Cassotta A, Bianchi S, et al. Specificity, cross-  
697 reactivity, and function of antibodies elicited by Zika virus infection. *Science*. 2016;353(6301):823-6.
- 698 39. Kudlacek ST, Premkumar L, Metz SW, Tripathy A, Bobkov AA, Payne AM, et al. Physiological  
699 temperatures reduce dimerization of dengue and Zika virus recombinant envelope proteins. *J Biol*  
700 *Chem*. 2018;293(23):8922-33.
- 701 40. Yang C, Zeng F, Gao X, Zhao S, Li X, Liu S, et al. Characterization of two engineered dimeric Zika  
702 virus envelope proteins as immunogens for neutralizing antibody selection and vaccine design. *J Biol*  
703 *Chem*. 2019;294(27):10638-48.
- 704 41. Slon-Campos JL, Dejnirattisai W, Jagger BW, Lopez-Camacho C, Wongwiwat W, Durnell LA, et  
705 al. A protective Zika virus E-dimer-based subunit vaccine engineered to abrogate antibody-dependent  
706 enhancement of dengue infection. *Nat Immunol*. 2019.
- 707 42. Metz SW, Thomas A, Brackbill A, Forsberg J, Miley MJ, Lopez CA, et al. Oligomeric state of the  
708 ZIKV E protein defines protective immune responses. *Nat Commun*. 2019;10(1):4606.
- 709 43. Kostyuchenko VA, Lim EX, Zhang S, Fibriansah G, Ng TS, Ooi JS, et al. Structure of the thermally  
710 stable Zika virus. *Nature*. 2016;533(7603):425-8.
- 711 44. Smith SA, Nivarthi UK, de Alwis R, Kose N, Sapparapu G, Bombardi R, et al. Dengue Virus prM-  
712 Specific Human Monoclonal Antibodies with Virus Replication-Enhancing Properties Recognize a  
713 Single Immunodominant Antigenic Site. *Journal of virology*. 2016;90(2):780-9.
- 714 45. Priyamvada L, Quicke KM, Hudson WH, Onlamoon N, Sewatanon J, Edupuganti S, et al. Human  
715 antibody responses after dengue virus infection are highly cross-reactive to Zika virus. *Proc Natl Acad*  
716 *Sci U S A*. 2016;113(28):7852-7.
- 717 46. Bardina SV, Bunduc P, Tripathi S, Duehr J, Frere JJ, Brown JA, et al. Enhancement of Zika virus  
718 pathogenesis by preexisting antinflavivirus immunity. *Science*. 2017;356(6334):175-80.
- 719 47. Willis E, Hensley SE. Characterization of Zika virus binding and enhancement potential of a  
720 large panel of flavivirus murine monoclonal antibodies. *Virology*. 2017;508:1-6.
- 721 48. Pantoja P, Perez-Guzman EX, Rodriguez IV, White LJ, Gonzalez O, Serrano C, et al. Zika virus  
722 pathogenesis in rhesus macaques is unaffected by pre-existing immunity to dengue virus. *Nat*  
723 *Commun*. 2017;8:15674.
- 724 49. Gordon A, Gresh L, Ojeda S, Katzelnick LC, Sanchez N, Mercado JC, et al. Prior dengue virus  
725 infection and risk of Zika: A pediatric cohort in Nicaragua. *PLoS Med*. 2019;16(1):e1002726.

- 726 50. Duehr J, Lee S, Singh G, Foster GA, Kryzstof D, Stramer SL, et al. Tick-Borne Encephalitis Virus  
727 Vaccine-Induced Human Antibodies Mediate Negligible Enhancement of Zika Virus Infection InVitro  
728 and in a Mouse Model. *mSphere*. 2018;3(1).
- 729 51. Luppe MJ, Verro AT, Barbosa AS, Nogueira ML, Undurraga EA, da Silva NS. Yellow fever (YF)  
730 vaccination does not increase dengue severity: A retrospective study based on 11,448 dengue  
731 notifications in a YF and dengue endemic region. *Travel Med Infect Dis*. 2019.
- 732 52. Donald CL, Brennan B, Cumberworth SL, Rezelj VV, Clark JJ, Cordeiro MT, et al. Full Genome  
733 Sequence and sfRNA Interferon Antagonist Activity of Zika Virus from Recife, Brazil. *PLoS Negl Trop*  
734 *Dis*. 2016;10(10):e0005048.

735

736

737 **Figure Legends**

738

739 **Figure 1: Expression, purification and characterisation of ZIKV E antigens. (A)**

740 Schematics of the genetic constructs used to express SV5-tagged ZIKV sE (amino

741 acid or aa 1 – 404) in the WT or cvD (carrying A264C mutation) form. Expi293F cells

742 were transiently transfected with the relevant constructs and the expressed proteins

743 secreted into the medium were purified using V5-tag affinity chromatography. **(B)**

744 **SDS-PAGE of the purified protein.** sE-WT and sE-cvD were analysed in SDS-PAGE

745 run in presence or absence of reducing conditions. Black arrows show monomers of

746 sE, blue arrows show dimers. **(C) Schematics of VLP antigens design and**

747 **purification:** Plasmid constructs carrying the sequences encoding the capsid anchor

748 (i.e. the N-terminal 18 amino acids of Capsid protein), followed by prM and full-length

749 E genes, the latter in its WT form or in the form of cvD (i.e. carrying the A264C

750 mutation). The constructs were transiently transfected in Expi293F cells and the

751 secreted VLPs were pelleted by sucrose cushion 4 days post-transfection and

752 subsequently purified by density gradient followed by size-exclusion chromatography

753 (SEC). **(D) Western Blot of the purified VLPs showing dimeric conformation:**

754 Purified VLP-WT and VLP-cvD were analysed by SDS-PAGE under reducing or non-

755 reducing conditions E was detected using in-house made monoclonal antibody DIII-

756 1B. Black arrows show E monomers; blue arrow shows dimers; grey arrows show

757 higher order oligomers (non-reducing gel) or partially resolved complexes (reducing

758 gel) of the E protein. **(E) Western Blot of the purified VLPs showing prM and M**

759 **content:** Purified VLP-WT and VLP-cvD were analysed by SDS-PAGE (14%

760 acrylamide) under reducing conditions. Protein E was detected using the monoclonal

761 antibody DIII-1B (in green), whereas proteins prM and M were detected using an anti-

762 M antibody (in red). **(F) Electron microscope picture of purified VLPs:** Electron  
763 microscopy (uranyl acetate staining) of VLP-WT (left panel) and VLP-cvD (right panel)  
764 purified as described in (c). Bars indicate the diameter of the particles.

765

766 **Figure 2: (A) Schematic representation of the immunisation procedure:** Five  
767 groups each (n=6) of 4 weeks-old mice received respectively sE-WT, sE-cvD, VLP-  
768 WT, VLP-cvD or PBS, mixed with ALUM-MPLA adjuvant as shown. Following two  
769 boosts at weeks 2 and 3, test bleeds were collected at week 4 for analyses. **(B and**  
770 **C) Anti-E antibody titres of sera collected from animals immunised with sE (B)**  
771 **or VLP proteins (C).** Antibody titres were determined using ELISA plates coated with  
772 mono-biotinylated monomeric E, dimeric E and DIII. Ctrl: pooled sera from PBS control  
773 group. The titre was defined as the maximum dilution that gives a value higher than  
774 three-times the value given by the pre-immune sera. The control sera were negative  
775 at the lowest dilution (1:900) and their titre was calculated as 1/3 of that dilution (300).  
776 Statistical analysis was done using 2-sided ANOVA 95% confidence level with Tukey  
777 Pairwise comparison at 95% confidence (Minitab software).

778

779 **Figure 3: Determination of binding characteristics of serum IgGs to different sE**  
780 **conformations.** Cells expressing sE on the cell surface were incubated with **(A)**  
781 secondary anti-mouse ALEXA 488 antibody only (No abs), pooled control sera  
782 (Control), monoclonal EDE antibody 1C10 (EDE), monoclonal DIII-1B antibody (DIII-  
783 1B) or **(B)** sera from immunised animals (M1 to M6) at pH6.0 (red) or pH7.0 (blue) as  
784 shown. Following washing, the bound antibodies were detected using a fluorescence-  
785 tagged secondary antibody and the relative fluorescence determined by flow  
786 cytometry using FACSCalibur. Data from three independent experiments were used

787

788 **Figure 4: Determination of anti-E or neutralising antibody titres of sera from**

789 **vaccinated animals. (A) Anti-E titres:** ELISA plates coated with biotinylated dimeric

790 E were incubated with serially diluted serum samples and the bound antibodies

791 detected as described in Materials and Methods. Antibody titres were determined as

792 described in the Figure 2 legend. **(B) Neutralisation of ZIKV infection:** Serially

793 diluted samples of mouse sera were incubated with ZIKV for 1 hour before infecting

794 Vero cells. At 72 hours post-infection, the intracellular levels of E were determined by

795 capture sandwich ELISA and percentage of infectivity relative to the virus alone

796 infection was calculated. The results were plotted as MN<sub>50</sub> values - i.e. titres at which

797 50% neutralisation was achieved. Statistical analysis was performed using 2-sided

798 ANOVA 95% confidence level with Tukey Pairwise comparison at 95% confidence

799 (Minitab software). Data from three independent experiments were used

800

801 **Figure 5: *In vivo* efficacy of candidate vaccines. (A) Schematic representation**

802 **of the *in vivo* challenge protocol:** Mice were challenged with 10<sup>4</sup> pfu of ZIKV

803 PRVABC59 one month after the primary immunisation and were monitored for up to 9

804 days. Test bleeds (TB) and organs were collected as shown. **Animals were weighed**

805 **(B) and scored for clinical signs daily post-challenge with percentage of survival**

806 **shown in (C).** Animals displaying a weight loss of 15% or more were euthanised. All

807 the member of the control group reached the endpoint score 7-8 days post-challenge

808 and were therefore euthanised. Statistical analysis was performed using Log-Rank

809 (Mantel-Cox test) with GraphPad Prism software.

810 **(D/E) The levels of ZIKV in the serum at day 2, 3, 4 and 7 post-infection were**

811 **quantified by RT-qPCR and the results plotted as pfu/ml. (D) The limit of detection**

812 was estimated to be 100 pfu/mL, indicated by the green line. Columns show mean of  
813 all mice. Statistical significance is reported in the table. **(F) Relative viral load in**  
814 **brain, spleen and sexual organs:** The presence of viral RNA in tissues was  
815 quantified by RT-qPCR and the results plotted as relative viral load calculated on the  
816 average of the PBS control group. Statistical significance is reported in the table.  
817 Statistical analysis was done using 2-sided ANOVA 95% confidence level with Tukey  
818 Pairwise comparison at 95% confidence with Minitab software.

819

820 **Figure 6: Effect of pooled sera on ADE of infection by all four DENV serotypes**  
821 **1-4, ZIKV, WNV and YFV.** Viruses were pre-incubated with 10-fold dilution of pooled  
822 sera for 1 hour before infecting K562 cells. Percentage of infected cells was calculated  
823 by cytofluorimetry. Statistical significance applies to the comparison between VLP-WT  
824 and sE-cvD/VLP-cvD. Statistical analysis was done using 2-sided ANOVA 95%  
825 confidence level with Tukey Pairwise multiple comparison (GraphPad software).  
826 Experiments were performed in triplicate.

827

828 **Figure 7: (A) Survival rate of vaccinated animals upon ZIKV challenge:** Mice were  
829 challenged with  $10^4$  pfu of ZIKV MP1751. All the member of the control group reached  
830 the endpoint score 6 days post-challenge and were therefore euthanised. Statistical  
831 analysis was performed using Log-Rank (Mantel-Cox test) with GraphPad Prism  
832 software. **(B) Body weight variations after challenge:** weight loss of mice after ZIKV  
833 infection. Animals showing a weight loss of 15% or higher were euthanised. **(C) Viral**  
834 **load in serum:** The presence of ZIKV in the serum at day 2, 3 and 4 post-infection  
835 was quantified by RT-qPCR. Green line indicates the limit of detection. **(F) Relative**  
836 **viral load in brain:** presence of viral RNA in tissues was quantified by RT-qPCR.



837 Statistical analysis was done using 2 sided Two-Sample T-Test 95% confidence level  
838 with Minitab software.

839

## 840 **Legends to Supplementary Figures and Tables**

841

### 842 **S1 Figure: Characterisation of the mouse monoclonal antibody (MAb) DIII-1B.**

843 MAb DIII-1B was obtained using standard hybridomas technology from Balb/c mice  
844 that were immunised with recombinant domain III of ZIKV E protein. The specificity of  
845 MAb DIII-1B was tested by **(A)** western immunoblotting of VERO cells that were mock-  
846 infected (-) or infected with ZIKV (+). As expected, MAb DIII-1B specifically bound to  
847 ZIKV E protein. Protein molecular weight ladder is shown on the left in kDa.  
848 Separately, the binding specificity of MAb DIII-1B was also tested by **(B)** indirect  
849 immunofluorescence of uninfected or ZIKV-infected A549-NPro cells. Green signal  
850 indicates antibody binding to ZIKV E protein. Cell nuclei were stained with DAPI (blue).

851

### 852 **S2 Figure: Determination of neutralising antibody titres of sera from vaccinated**

853 **animals.** Serially diluted samples of mouse sera were incubated with ZIKV for 1 hour  
854 before infecting Vero cells. At 72 hours post-infection, the intracellular levels of E were  
855 determined by capture sandwich ELISA and percentage of infectivity relative to the  
856 virus alone infection was calculated. The results were plotted as MN<sub>50</sub> values - i.e.  
857 titres at which 50% neutralisation was achieved.

858

859 **Supplementary Table 1: (A)** Legend of scoring system used to monitor animal health  
860 following ZIKV challenge. **(B)** Table showing the score attributed to each animal after  
861 ZIKV PRVABC59 challenge.

862

863 **Supplementary Table 2:** Clinical scores attributed to each animal after ZIKV MP1751

864 challenge.

**A**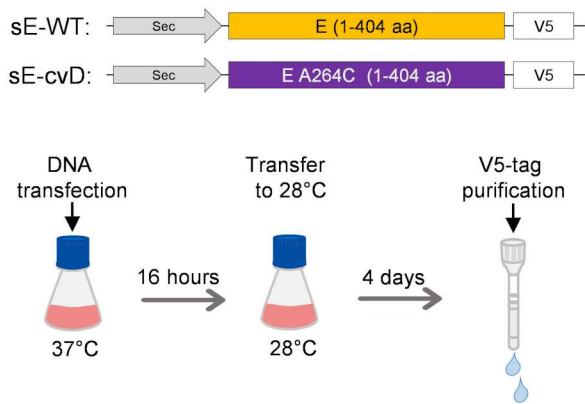**B**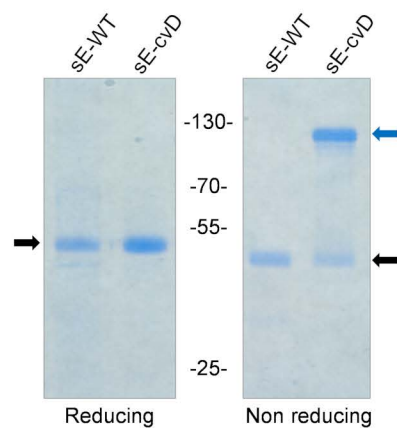**C**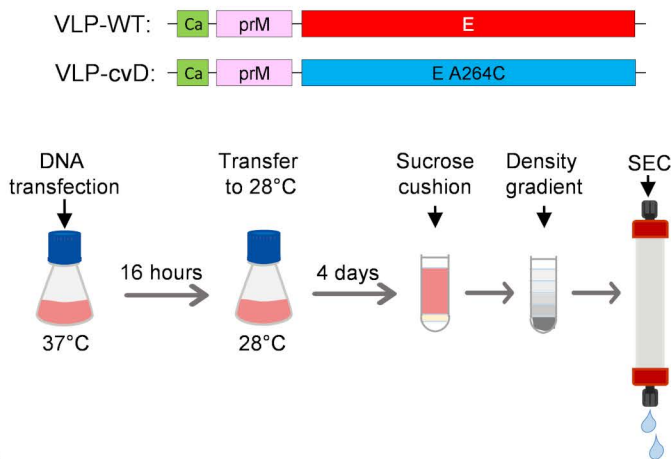**D**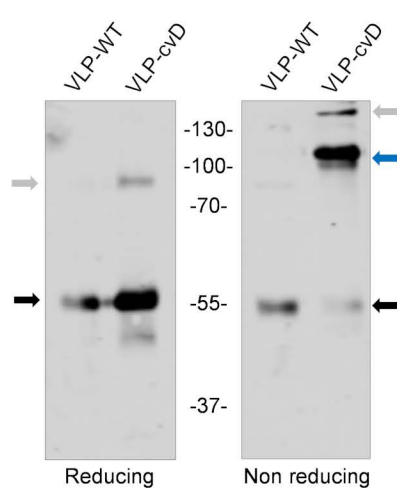**E**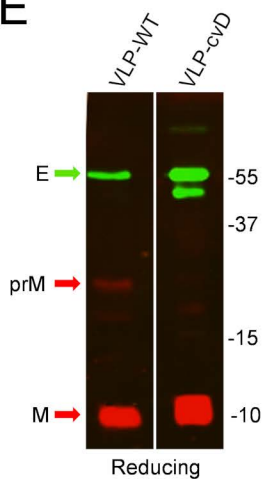**F**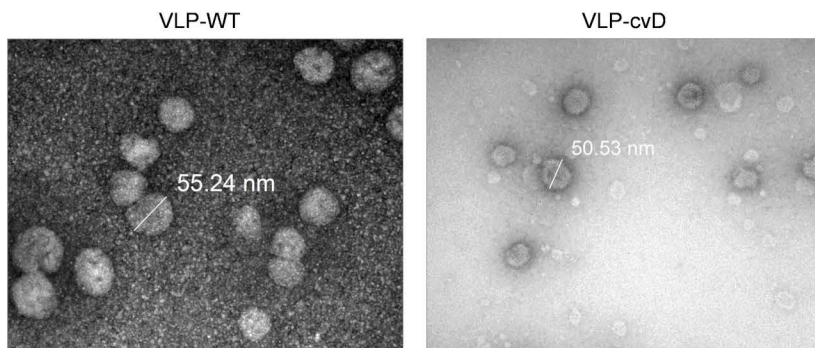

Figure 1

**A**

- sE-WT: 10 µg ZIKV sE-WT + ALUM MPLA 1%
- sE-cvD: 10 µg ZIKV sE-cvD + ALUM MPLA 1%
- VLP-WT: 2 µg ZIKV VLP-WT + ALUM MPLA 1%
- VLP-cvD: 2 µg ZIKV VLP-cvD + ALUM MPLA 1%
- Control: PBS + ALUM MPLA 1%

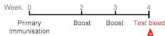**B**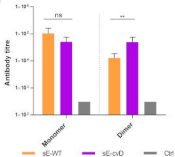**C**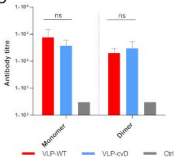**Figure 2**

**A**

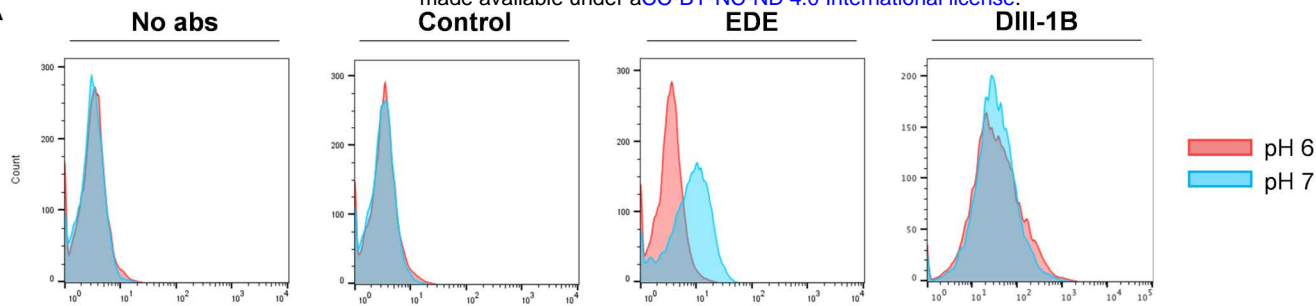

**B**

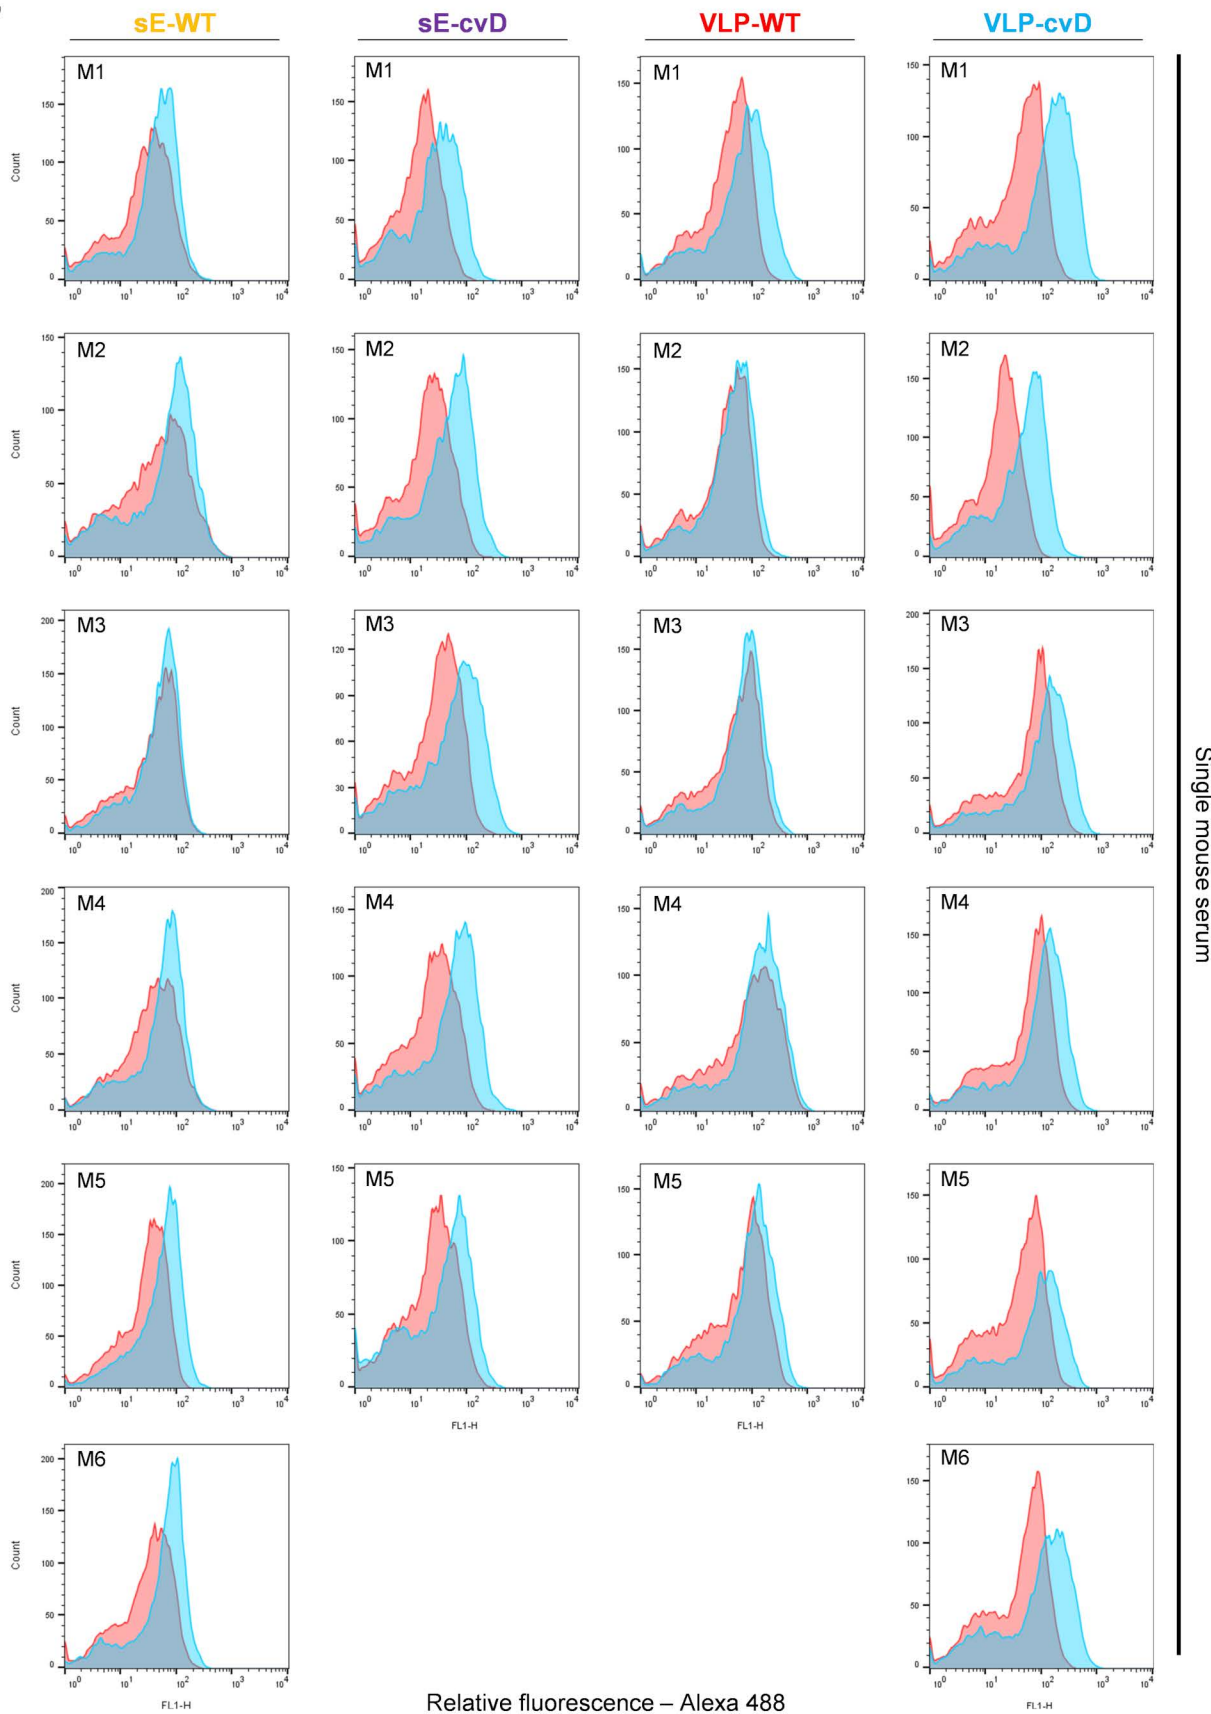

**Figure 3**

A

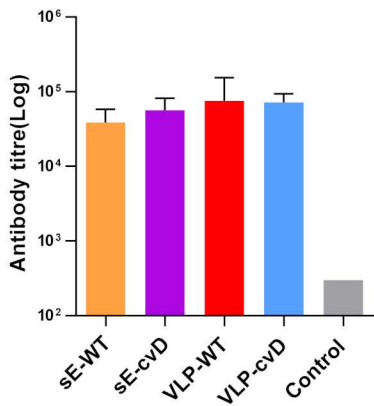

B

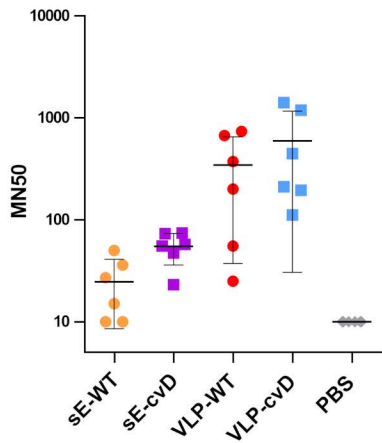

| MN50    | Control | sE-WT | sE-cvD | VLP-WT |
|---------|---------|-------|--------|--------|
| sE-WT   | ns      | -     | -      | -      |
| sE-cvD  | *       | ns    | -      | -      |
| VLP-WT  | ***     | **    | ns     | -      |
| VLP-cvD | ***     | ***   | **     | ns     |

Figure 4

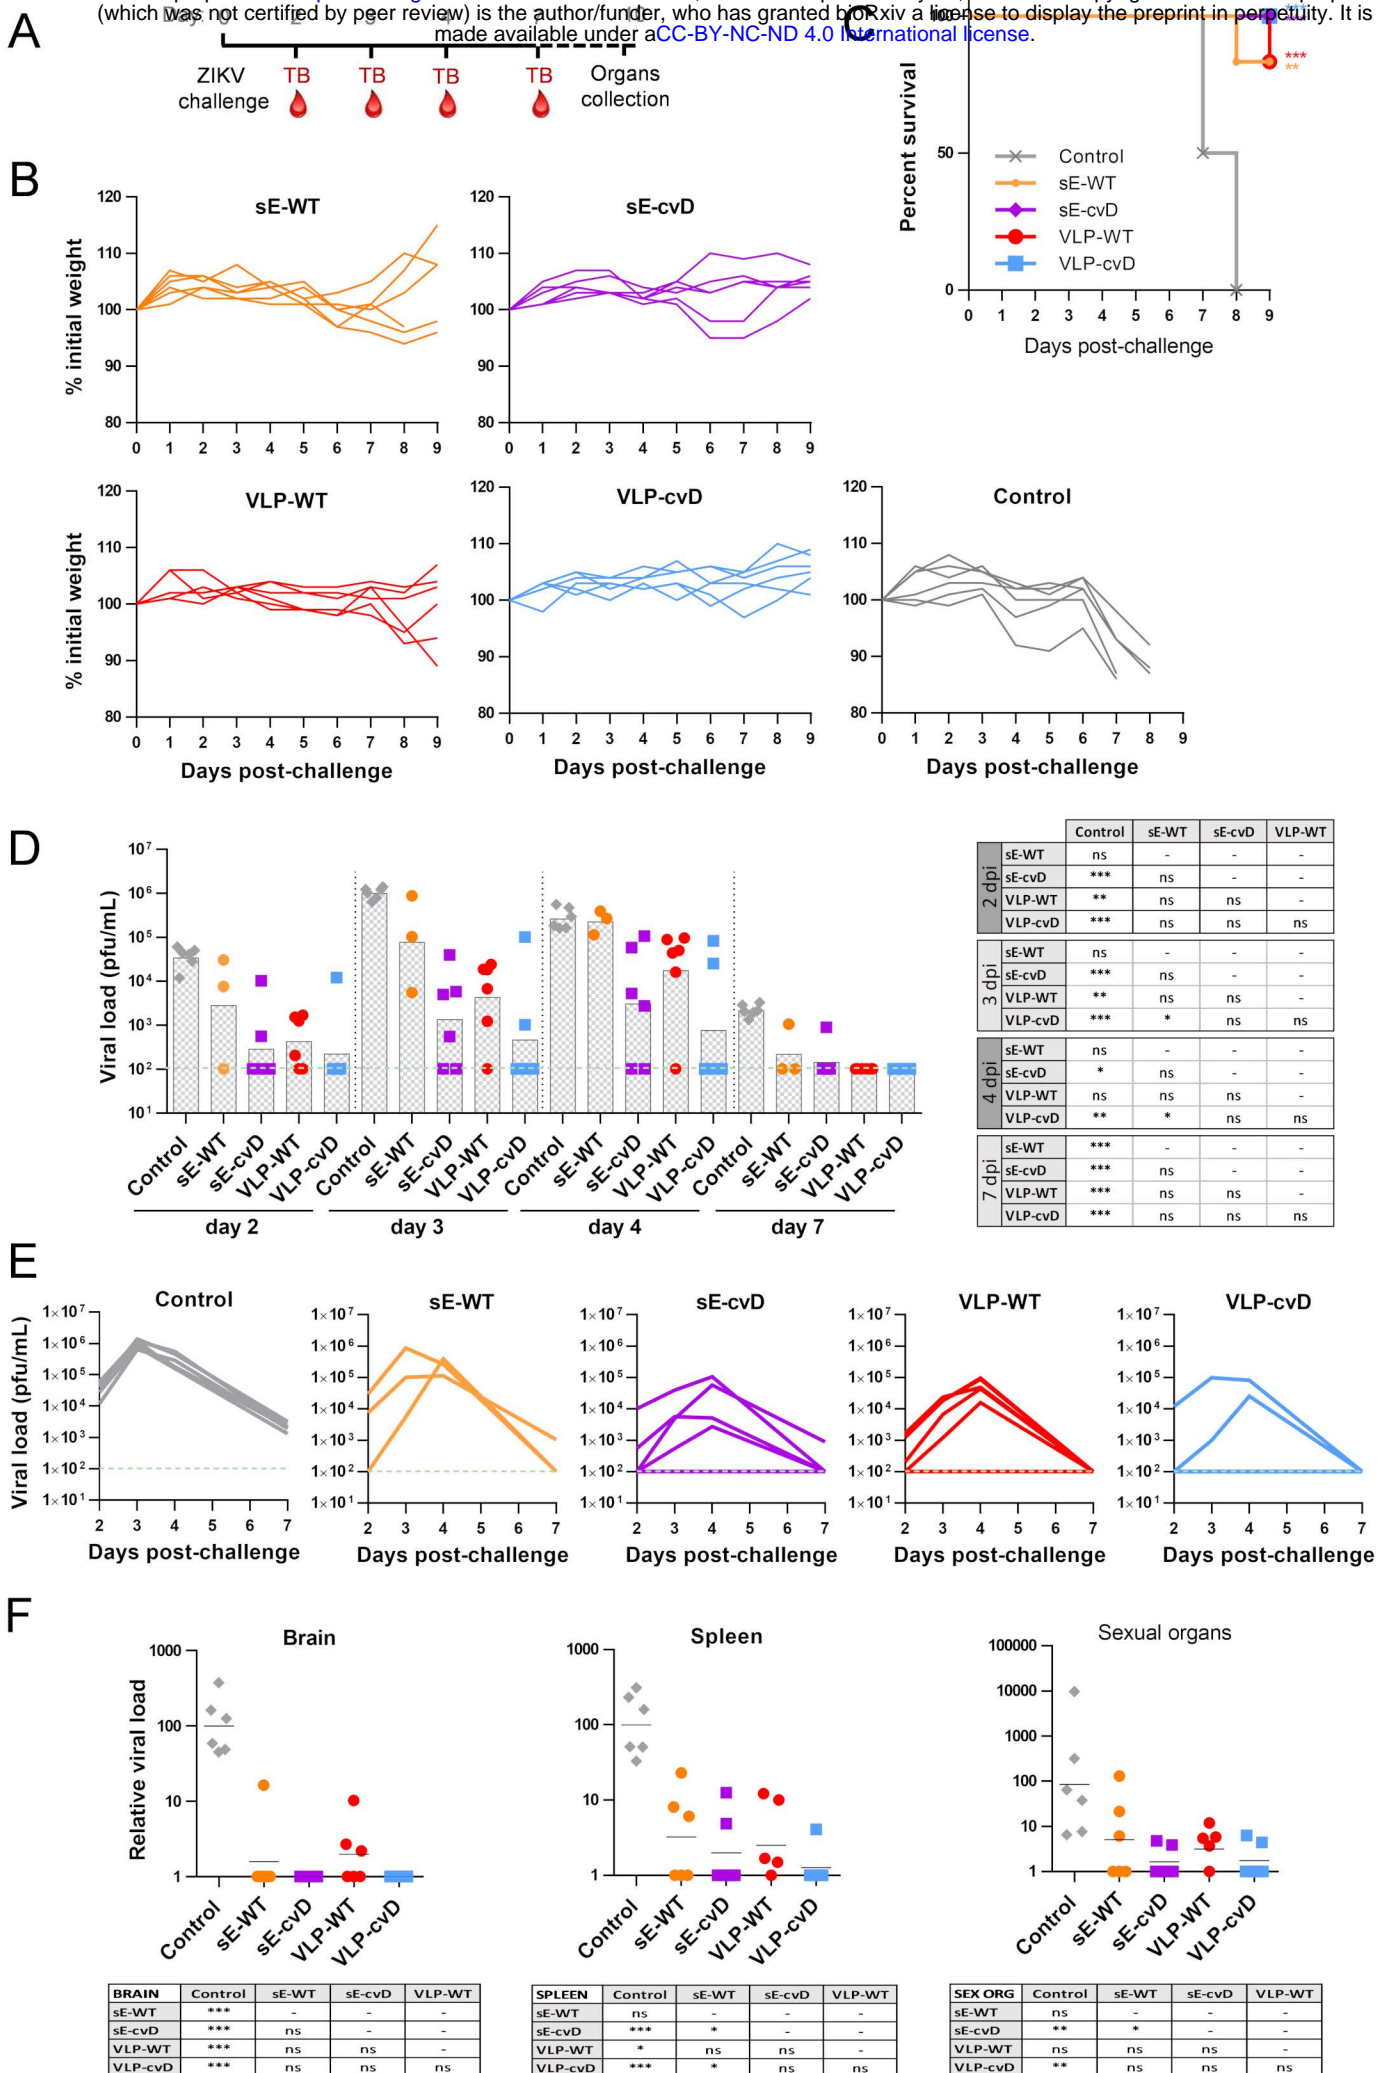

Figure 5

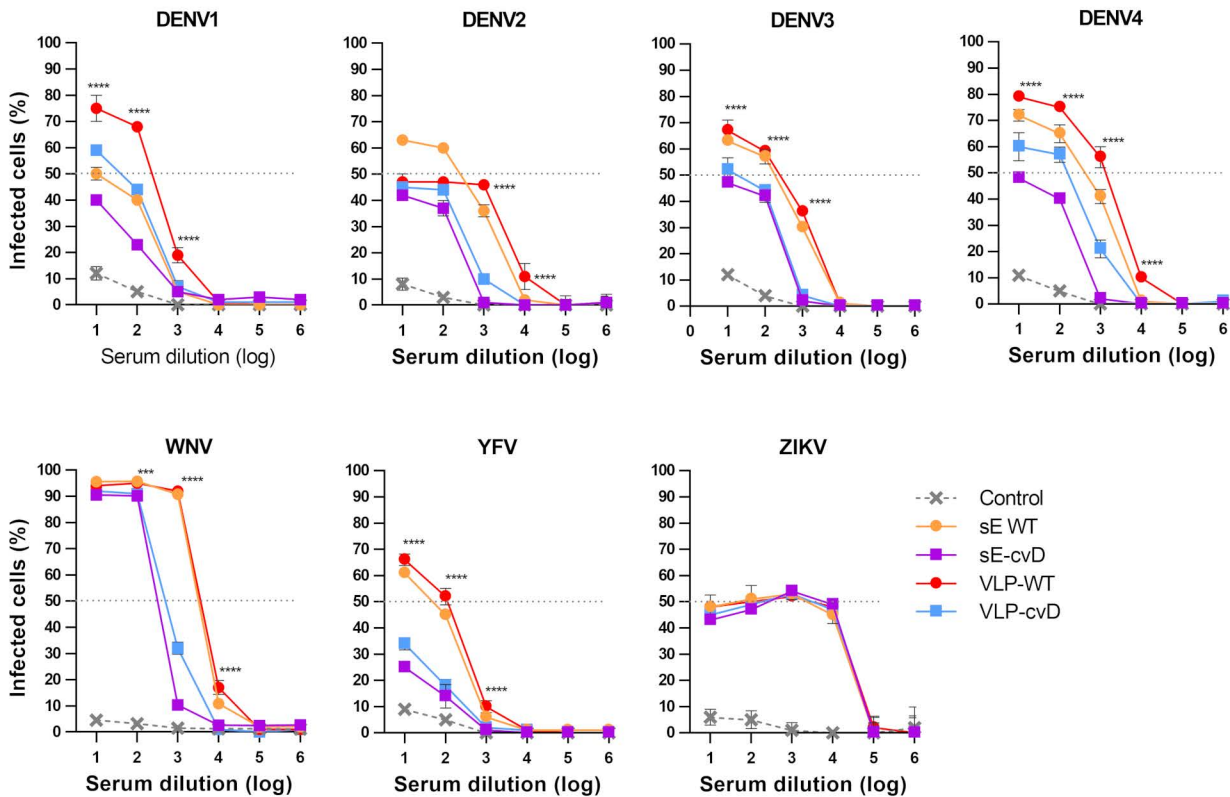

Figure 6



**A**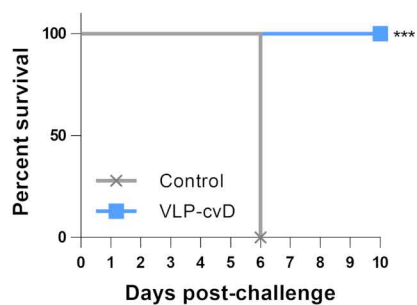**B**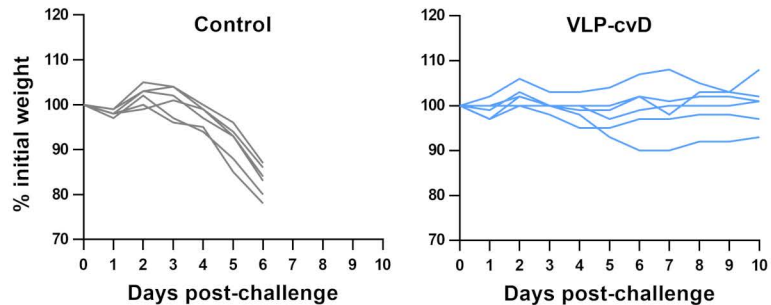**C**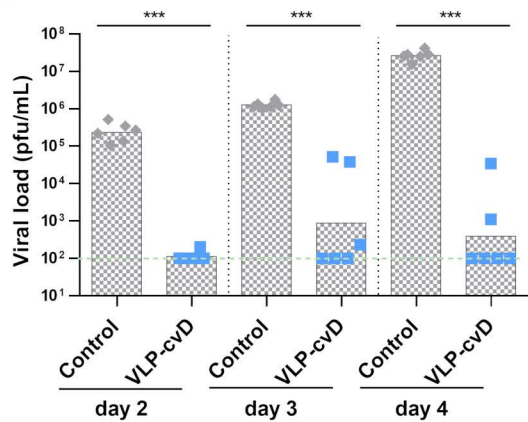**D**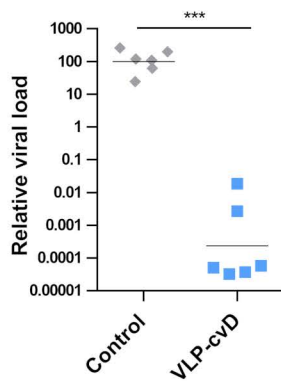

Figure 7

**A**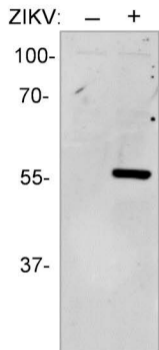**B**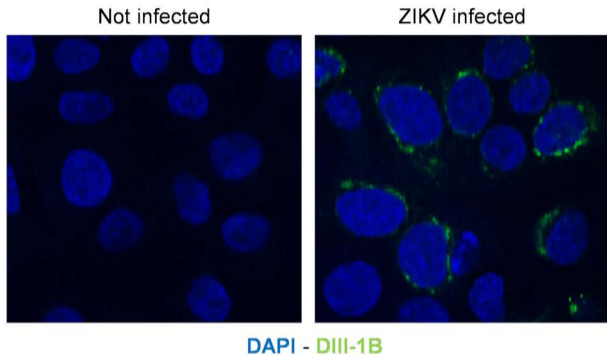

Supplementary Figure 1 (S1 Figure)

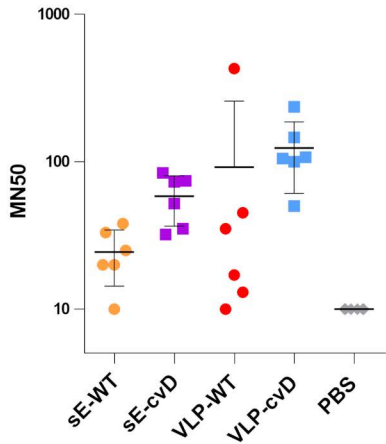

Supplementary Figure 2 (S2 Figure)

A

| Score | Definition                                             |
|-------|--------------------------------------------------------|
| 0     | No signs of infection/distress                         |
| 1     | Signs of mild infection/distress                       |
| 2     | One or two symptoms of infection                       |
| 3     | Three or more symptoms of infection or 15% weight loss |

B

|         |   | Days post challenge |   |   |   |   |   |   |   |   |   |   |
|---------|---|---------------------|---|---|---|---|---|---|---|---|---|---|
|         |   | Mouse               | 0 | 1 | 2 | 3 | 4 | 5 | 6 | 7 | 8 | 9 |
| Control | 1 | 0                   | 0 | 0 | 0 | 1 | 1 | 2 | 2 | 3 |   |   |
|         | 2 | 0                   | 0 | 0 | 1 | 0 | 1 | 1 | 2 | 3 |   |   |
|         | 3 | 0                   | 0 | 0 | 0 | 2 | 1 | 1 | 3 |   |   |   |
|         | 4 | 0                   | 0 | 0 | 0 | 1 | 1 | 1 | 3 |   |   |   |
|         | 5 | 0                   | 0 | 0 | 1 | 2 | 2 | 1 | 2 | 3 |   |   |
|         | 6 | 0                   | 0 | 0 | 0 | 1 | 2 | 2 | 3 |   |   |   |
| sE-WT   | 1 | 0                   | 0 | 0 | 1 | 0 | 1 | 2 | 1 | 1 | 2 |   |
|         | 2 | 0                   | 0 | 0 | 0 | 0 | 1 | 2 | 1 | 3 |   |   |
|         | 3 | 0                   | 0 | 0 | 1 | 0 | 1 | 2 | 1 | 1 | 1 |   |
|         | 4 | 0                   | 0 | 0 | 1 | 1 | 1 | 2 | 1 | 2 | 1 |   |
|         | 5 | 0                   | 0 | 0 | 1 | 1 | 2 | 2 | 2 | 2 | 1 |   |
|         | 6 | 0                   | 0 | 0 | 0 | 1 | 2 | 2 | 1 | 2 | 1 |   |
| sE-cvD  | 1 | 0                   | 0 | 0 | 0 | 0 | 1 | 1 | 1 | 0 | 0 |   |
|         | 2 | 0                   | 0 | 0 | 1 | 0 | 1 | 1 | 1 | 0 | 0 |   |
|         | 3 | 0                   | 0 | 0 | 0 | 0 | 1 | 1 | 1 | 0 | 0 |   |
|         | 4 | 0                   | 0 | 0 | 0 | 0 | 1 | 2 | 1 | 0 | 0 |   |
|         | 5 | 0                   | 0 | 0 | 0 | 0 | 1 | 1 | 2 | 1 | 0 |   |
|         | 6 | 0                   | 0 | 0 | 0 | 1 | 2 | 1 | 1 | 1 | 0 |   |
| VLP-WT  | 1 | 0                   | 0 | 0 | 0 | 1 | 2 | 2 | 2 | 2 | 0 |   |
|         | 2 | 0                   | 0 | 0 | 0 | 1 | 1 | 1 | 2 | 2 | 3 |   |
|         | 3 | 0                   | 0 | 0 | 0 | 1 | 1 | 1 | 2 | 1 | 0 |   |
|         | 4 | 0                   | 0 | 0 | 0 | 1 | 1 | 2 | 2 | 1 | 1 |   |
|         | 5 | 0                   | 0 | 0 | 1 | 1 | 1 | 1 | 1 | 1 | 0 |   |
|         | 6 | 0                   | 0 | 0 | 0 | 1 | 1 | 1 | 2 | 1 | 1 |   |
| VLP-cvD | 1 | 0                   | 0 | 0 | 1 | 1 | 1 | 0 | 0 | 0 | 0 |   |
|         | 2 | 0                   | 0 | 0 | 1 | 1 | 1 | 1 | 0 | 0 | 0 |   |
|         | 3 | 0                   | 0 | 0 | 0 | 1 | 1 | 1 | 1 | 1 | 1 |   |
|         | 4 | 0                   | 0 | 0 | 0 | 0 | 1 | 1 | 1 | 0 | 1 |   |
|         | 5 | 0                   | 0 | 0 | 1 | 1 | 2 | 1 | 1 | 1 | 1 |   |
|         | 6 | 0                   | 0 | 0 | 0 | 0 | 2 | 2 | 1 | 0 | 1 |   |

Supplementary Table 1 (S1 Table)

|         |   | Days post challenge |   |   |   |   |   |   |   |   |   |    |  |
|---------|---|---------------------|---|---|---|---|---|---|---|---|---|----|--|
| Mouse   |   | 0                   | 1 | 2 | 3 | 4 | 5 | 6 | 7 | 8 | 9 | 10 |  |
| Control | 1 | 0                   | 0 | 0 | 1 | 1 | 2 | 3 |   |   |   |    |  |
|         | 2 | 0                   | 0 | 0 | 0 | 1 | 2 | 3 |   |   |   |    |  |
|         | 3 | 0                   | 0 | 0 | 0 | 1 | 2 | 3 |   |   |   |    |  |
|         | 4 | 0                   | 0 | 0 | 1 | 1 | 2 | 3 |   |   |   |    |  |
|         | 5 | 0                   | 0 | 0 | 1 | 1 | 2 | 3 |   |   |   |    |  |
|         | 6 | 0                   | 0 | 0 | 2 | 1 | 2 | 3 |   |   |   |    |  |
| VLP-cvd | 1 | 0                   | 0 | 0 | 1 | 2 | 2 | 2 | 2 | 0 | 1 | 0  |  |
|         | 2 | 0                   | 0 | 0 | 0 | 1 | 1 | 1 | 0 | 0 | 0 | 0  |  |
|         | 3 | 0                   | 0 | 0 | 1 | 2 | 0 | 0 | 0 | 0 | 0 | 0  |  |
|         | 4 | 0                   | 0 | 0 | 2 | 1 | 0 | 0 | 0 | 0 | 0 | 0  |  |
|         | 5 | 0                   | 0 | 0 | 0 | 0 | 0 | 0 | 0 | 0 | 0 | 0  |  |
|         | 6 | 0                   | 0 | 0 | 1 | 1 | 0 | 0 | 0 | 0 | 0 | 0  |  |

Supplementary Table 2 (S2 Table)
